# Supplementary material
Source: PubMed Central journal article supplement (PMC6516061)
Supplement: NIHMS1026391-supplement-Supplementary_Information.pdf [file NIHMS1026391-supplement-Supplementary_Information.pdf]

# SUPPLEMENTARY INFORMATION

## A NIR Fluorescent Rosol Dye Tailored toward Lymphatic Mapping Applications

Kenneth S. Hettie<sup>1†</sup>, Jessica L. Klockow<sup>1†</sup>, Timothy E. Glass<sup>2</sup>, Frederick T. Chin<sup>1\*</sup>

<sup>1</sup>Molecular Imaging Program at Stanford (MIPS), Department of Radiology, Stanford University School of Medicine, Stanford, California 94305

<sup>2</sup>Department of Chemistry, University of Missouri, Columbia, MO 65211

\*Corresponding author

†Equal contribution

| TABLE OF CONTENTS                                                                                  | PAGE        |
|----------------------------------------------------------------------------------------------------|-------------|
| <b>1. Generic Molecular Fluorescent Dyes Commonly Used for Lymphatic Mapping Applications.....</b> | S-2         |
| <b>2. Computational Methods &amp; Correlation Plots.....</b>                                       | S-3 - S-6   |
| Torsion Angles (modeled).....                                                                      | S-3         |
| Linear Regression Analyses (correlation plots).....                                                | S-3         |
| Z-Matrices (Internal Coordinates) of Modeled Structures.....                                       | S-4 - S-6   |
| <b>3. Chemical Synthesis.....</b>                                                                  | S-7 - S-9   |
| <b>4. UV/Vis &amp; Fluorescence Spectroscopy.....</b>                                              | S-10 - S-17 |
| Quantum Yield.....                                                                                 | S-10        |
| Absorption Spectra.....                                                                            | S-11        |
| pH Titrations.....                                                                                 | S-11 - S-15 |
| Solvatochromatic Shift.....                                                                        | S-16        |
| Bioanalyte Titrations.....                                                                         | S-17        |
| Absorption-Based Linearity Profile.....                                                            | S-17        |
| <b>5. Cellular Analyses.....</b>                                                                   | S-18 - S-19 |
| <b>6. <i>In Vivo</i> Studies.....</b>                                                              | S-20        |
| <b>7. <sup>1</sup>H &amp; <sup>13</sup>C NMR Spectroscopy.....</b>                                 | S-21 - S-35 |
| <b>8. References.....</b>                                                                          | S-36        |

## 1. Generic Molecular Fluorescent Dyes Commonly Used for Lymphatic Mapping Applications

**Table S1.** Chemical structures, photophysical and physical properties of the limited set of generic molecular fluorescent dyes commonly used for lymphatic fluorescence mapping applications.

|                                                  | <b>Fluorescein</b><br>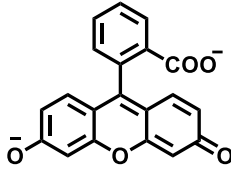 | <b>Methylene Blue (MB)</b><br> | <b>Indocyanine Green (ICG)</b><br> |
|--------------------------------------------------|---------------------------------------------------------------------------------------------------------|------------------------------------------------------------------------------------------------------------------|-----------------------------------------------------------------------------------------------------------------------|
| M.W. (g/mol)                                     | 330.30 (at pH 7.4 as drawn)<br>332.31 (neutral form)<br>376.27 (disodium salt)                          | 284.40 (at pH 7.4 as drawn)<br>319.85 (chloride salt)                                                            | 751.98 (at pH 7.4 as drawn)<br>774.96 (monosodium salt)                                                               |
| $\lambda_{\text{abs}}$ (nm)<br>in aqueous buffer | 434 (neutral species)<br>450 & 470 (anionic species)<br>490 (dianionic species)                         | 664                                                                                                              | 785                                                                                                                   |
| $\lambda_{\text{em}}$ (nm)<br>in aqueous buffer  | 520                                                                                                     | 690                                                                                                              | 822                                                                                                                   |
| Stokes shift (nm)                                | 30                                                                                                      | 26                                                                                                               | 37                                                                                                                    |
| $pK_a$                                           | 2.1, 4.3, ~6.4                                                                                          | <2.0                                                                                                             | 3.3                                                                                                                   |

## 2. Computational Methods & Correlation Plots

red arrow = torsion angle  
about the N-C3' bond

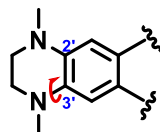

**N-Methyl-THQ-Rosol**

red arrow = torsion angle  
about the N-C2' bond

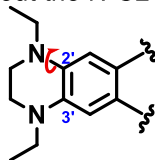

**N-Ethyl-THQ-Rosol  
("THQ-Rosol")**

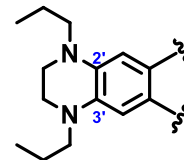

**N-Propyl-THQ-Rosol**

|                                  |          |          |          |
|----------------------------------|----------|----------|----------|
| $E_{LUMO}$ (hartrees)            | -0.07337 | -0.06856 | -0.06821 |
| $E_{HOMO}$ (hartrees)            | -0.18167 | -0.17245 | -0.17175 |
| $\Delta E$ (hartrees)            | 0.10830  | 0.10389  | 0.10354  |
| Torsion angle N-C2' ( $\theta$ ) | 18.24°   | 12.21°   | 15.47°   |
| Torsion angle N-C3' ( $\theta$ ) | 13.38°   | 10.34°   | 15.80°   |

**Figure S1. Torsion Angles.** Molecular modeling alongside DFT calculations provided the energy of the highest and lowest occupied molecular orbital values ( $E_{HOMO}$  and  $E_{LUMO}$ , respectively), the molecular orbital energy gap ( $\Delta E$ ), and torsion angles ( $\theta$ ) of additionally-explored N-substituted **THQ-Rosol** dye analogues, all of which have a larger/comparable molecular orbital energy gap and/or torsion angle relative to **THQ-Rosol**.

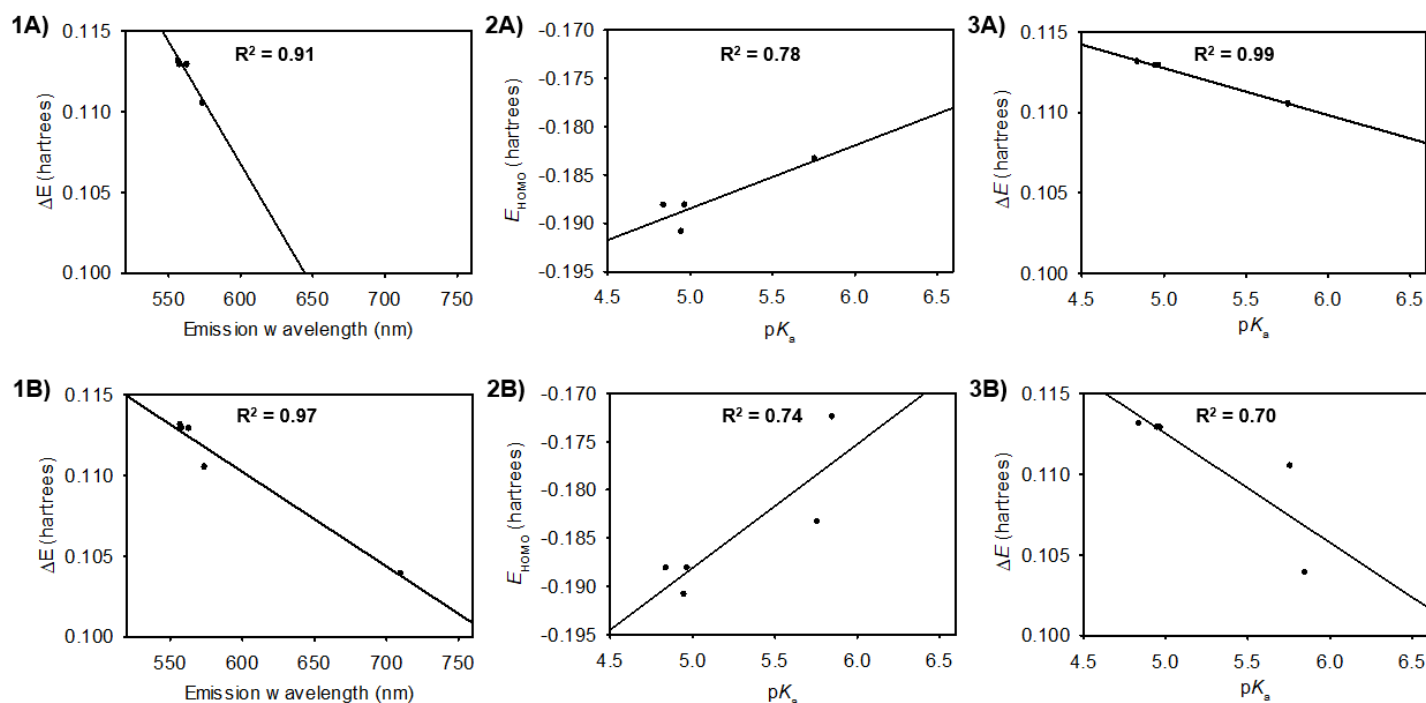

**Figure S2. Linear Regression Analysis.** Linear regression analyses of the calculated energetics in relation to the measured maximum fluorescence emission wavelength and experimentally-determined  $pK_a$  values. Plots in the top row (1A, 2A, 3A) correlate various calculated values/evaluated properties for the following fluorophores: **Me-Rosol**, **Et-Rosol**, **Pip-Rosol**, and **Jul-Rosol**. Plots in the bottom row (1B, 2B, 3B) include **THQ-Rosol** in the analysis and their accompanying coefficient of determination.

**Table S2.** Z-Matrices (Internal Coordinates) of Modeled Structures

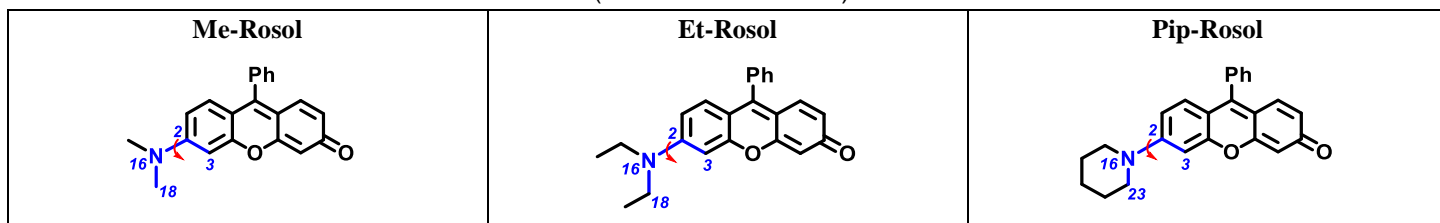

The Z-matrix for each modeled structure as provided by Gaussian, wherein each atom is labeled according to its numbering system.

| Tag | Symbol | NA | NB | NC | Bond  | Angle  | Dihedral |
|-----|--------|----|----|----|-------|--------|----------|
| 1   | C      |    |    |    |       |        |          |
| 2   | C      | 1  |    |    | 1.404 |        |          |
| 3   | C      | 2  | 1  |    | 1.404 | 115.49 |          |
| 4   | C      | 3  | 2  | 1  | 1.404 | 122.24 | -1.28    |
| 5   | C      | 4  | 3  | 2  | 1.388 | 121.46 | 0.53     |
| 6   | C      | 5  | 4  | 3  | 1.397 | 117.38 | 0.29     |
| 7   | O      | 4  | 3  | 2  | 1.370 | 116.19 | -179.59  |
| 8   | C      | 7  | 4  | 3  | 1.387 | 119.31 | 179.97   |
| 9   | C      | 8  | 7  | 4  | 1.473 | 120.40 | 0.09     |
| 10  | C      | 9  | 8  | 7  | 1.361 | 120.49 | 0.00     |
| 11  | C      | 8  | 7  | 4  | 1.340 | 118.25 | -179.90  |
| 12  | C      | 11 | 8  | 7  | 1.476 | 121.13 | 179.97   |
| 13  | C      | 12 | 11 | 8  | 1.478 | 117.66 | 0.07     |
| 14  | C      | 13 | 12 | 11 | 1.340 | 120.67 | -0.06    |
| 15  | O      | 12 | 11 | 8  | 1.225 | 121.26 | -179.91  |
| 16  | N      | 2  | 1  | 6  | 1.400 | 122.30 | 179.12   |
| 17  | C      | 16 | 2  | 1  | 1.462 | 119.19 | 13.35    |
| 18  | C      | 16 | 2  | 1  | 1.463 | 118.77 | 163.72   |
| 19  | C      | 10 | 9  | 8  | 1.485 | 120.41 | 179.99   |
| 20  | C      | 19 | 10 | 9  | 1.401 | 120.22 | -90.27   |
| 21  | C      | 20 | 19 | 10 | 1.396 | 120.14 | -179.83  |
| 22  | C      | 21 | 20 | 19 | 1.395 | 120.03 | 0.12     |
| 23  | C      | 22 | 21 | 20 | 1.395 | 120.11 | 0.09     |
| 24  | C      | 23 | 22 | 21 | 1.396 | 120.03 | -0.08    |
| 25  | H      | 1  | 2  | 16 | 1.086 | 121.04 | -0.81    |
| 26  | H      | 3  | 2  | 1  | 1.085 | 120.93 | 178.33   |
| 27  | H      | 6  | 5  | 4  | 1.088 | 121.03 | 179.46   |
| 28  | H      | 11 | 8  | 7  | 1.082 | 122.26 | -0.02    |
| 29  | H      | 13 | 12 | 11 | 1.083 | 116.73 | 179.94   |
| 30  | H      | 14 | 13 | 12 | 1.086 | 118.17 | 179.98   |
| 31  | H      | 17 | 16 | 2  | 1.096 | 111.22 | -179.01  |
| 32  | H      | 17 | 16 | 2  | 1.095 | 111.25 | -61.32   |
| 33  | H      | 17 | 16 | 2  | 1.096 | 111.06 | 61.18    |
| 34  | H      | 18 | 16 | 2  | 1.096 | 111.30 | -178.09  |
| 35  | H      | 18 | 16 | 2  | 1.096 | 111.08 | -58.33   |
| 36  | H      | 18 | 16 | 2  | 1.095 | 111.21 | 64.13    |
| 37  | H      | 20 | 19 | 10 | 1.088 | 120.31 | 0.09     |
| 38  | H      | 21 | 20 | 19 | 1.087 | 119.95 | -179.98  |
| 39  | H      | 22 | 21 | 20 | 1.087 | 119.94 | 179.95   |
| 40  | H      | 23 | 22 | 21 | 1.087 | 120.01 | 179.82   |
| 41  | H      | 24 | 23 | 22 | 1.088 | 119.55 | 179.81   |

| Tag | Symbol | NA | NB | NC | Bond  | Angle  | Dihedral |
|-----|--------|----|----|----|-------|--------|----------|
| 1   | C      |    |    |    |       |        |          |
| 2   | C      | 1  |    |    | 1.404 |        |          |
| 3   | C      | 2  | 1  |    | 1.404 | 115.26 |          |
| 4   | C      | 3  | 2  | 1  | 1.404 | 122.40 | -0.03    |
| 5   | C      | 4  | 3  | 2  | 1.388 | 121.45 | -0.06    |
| 6   | C      | 5  | 4  | 3  | 1.396 | 117.32 | 0.08     |
| 7   | O      | 4  | 3  | 2  | 1.370 | 116.20 | 179.79   |
| 8   | C      | 7  | 4  | 3  | 1.387 | 119.31 | 179.98   |
| 9   | C      | 8  | 7  | 4  | 1.473 | 120.40 | 0.05     |
| 10  | C      | 9  | 8  | 7  | 1.361 | 120.49 | 0.04     |
| 11  | C      | 8  | 7  | 4  | 1.340 | 118.25 | -179.95  |
| 12  | C      | 11 | 8  | 7  | 1.476 | 121.13 | 179.98   |
| 13  | C      | 12 | 11 | 8  | 1.478 | 117.66 | 0.00     |
| 14  | C      | 13 | 12 | 11 | 1.340 | 120.67 | 0.01     |
| 15  | O      | 12 | 11 | 8  | 1.225 | 121.26 | -179.99  |
| 16  | N      | 2  | 1  | 6  | 1.391 | 122.33 | -179.91  |
| 17  | C      | 16 | 2  | 1  | 1.470 | 122.12 | -13.72   |
| 18  | C      | 16 | 2  | 1  | 1.470 | 121.45 | 165.12   |
| 19  | C      | 10 | 9  | 8  | 1.485 | 120.42 | 179.98   |
| 20  | C      | 19 | 10 | 9  | 1.401 | 120.22 | 90.31    |
| 21  | C      | 20 | 19 | 10 | 1.396 | 120.14 | 179.84   |
| 22  | C      | 21 | 20 | 19 | 1.395 | 120.03 | -0.13    |
| 23  | C      | 22 | 21 | 20 | 1.395 | 120.11 | -0.09    |
| 24  | C      | 23 | 22 | 21 | 1.396 | 120.03 | 0.09     |
| 25  | C      | 17 | 16 | 2  | 1.523 | 111.79 | -72.65   |
| 26  | C      | 18 | 16 | 2  | 1.521 | 111.45 | 94.20    |
| 27  | H      | 1  | 2  | 16 | 1.086 | 120.94 | -0.64    |
| 28  | H      | 3  | 2  | 1  | 1.085 | 120.88 | 178.75   |
| 29  | H      | 6  | 5  | 4  | 1.087 | 121.05 | -179.89  |
| 30  | H      | 11 | 8  | 7  | 1.082 | 122.26 | -0.01    |
| 31  | H      | 13 | 12 | 11 | 1.083 | 116.73 | -179.99  |
| 32  | H      | 14 | 13 | 12 | 1.086 | 118.17 | -180.00  |
| 33  | H      | 17 | 16 | 2  | 1.096 | 111.21 | 51.97    |
| 34  | H      | 17 | 16 | 2  | 1.097 | 110.08 | 167.77   |
| 35  | H      | 18 | 16 | 2  | 1.097 | 109.75 | -145.37  |
| 36  | H      | 18 | 16 | 2  | 1.096 | 111.72 | -30.03   |
| 37  | H      | 20 | 19 | 10 | 1.088 | 120.31 | -0.09    |
| 38  | H      | 21 | 20 | 19 | 1.087 | 119.95 | 179.97   |
| 39  | H      | 22 | 21 | 20 | 1.087 | 119.94 | -179.94  |
| 40  | H      | 23 | 22 | 21 | 1.087 | 120.02 | -179.81  |
| 41  | H      | 24 | 23 | 22 | 1.088 | 119.56 | -179.80  |
| 42  | H      | 25 | 17 | 16 | 1.095 | 110.04 | -177.41  |
| 43  | H      | 25 | 17 | 16 | 1.094 | 111.24 | -57.80   |
| 44  | H      | 25 | 17 | 16 | 1.094 | 112.05 | 62.71    |
| 45  | H      | 26 | 18 | 16 | 1.095 | 110.13 | -177.33  |
| 46  | H      | 26 | 18 | 16 | 1.094 | 111.82 | -57.05   |
| 47  | H      | 26 | 18 | 16 | 1.094 | 111.07 | 63.39    |

| Tag | Symbol | NA | NB | NC | Bond  | Angle  | Dihedral |
|-----|--------|----|----|----|-------|--------|----------|
| 1   | C      |    |    |    |       |        |          |
| 2   | C      | 1  |    |    | 1.405 |        |          |
| 3   | C      | 2  | 1  |    | 1.404 | 114.99 |          |
| 4   | C      | 3  | 2  | 1  | 1.405 | 122.47 | 2.57     |
| 5   | C      | 4  | 3  | 2  | 1.387 | 121.52 | -1.13    |
| 6   | C      | 5  | 4  | 3  | 1.395 | 117.23 | -0.55    |
| 7   | O      | 4  | 3  | 2  | 1.370 | 116.16 | 178.94   |
| 8   | C      | 7  | 4  | 3  | 1.387 | 119.31 | -179.91  |
| 9   | C      | 8  | 7  | 4  | 1.473 | 120.40 | -0.13    |
| 10  | C      | 9  | 8  | 7  | 1.360 | 120.48 | 0.02     |
| 11  | C      | 8  | 7  | 4  | 1.340 | 118.26 | 179.87   |
| 12  | C      | 11 | 8  | 7  | 1.476 | 121.13 | -179.98  |
| 13  | C      | 12 | 11 | 8  | 1.478 | 117.66 | -0.07    |
| 14  | C      | 13 | 12 | 11 | 1.340 | 120.67 | 0.06     |
| 15  | O      | 12 | 11 | 8  | 1.225 | 121.26 | 179.90   |
| 16  | N      | 2  | 1  | 6  | 1.402 | 122.02 | -178.61  |
| 17  | C      | 10 | 9  | 8  | 1.485 | 120.43 | -180.00  |
| 18  | C      | 17 | 10 | 9  | 1.401 | 120.22 | -90.33   |
| 19  | C      | 18 | 17 | 10 | 1.396 | 120.14 | -179.84  |
| 20  | C      | 19 | 18 | 17 | 1.395 | 120.03 | 0.13     |
| 21  | C      | 20 | 19 | 18 | 1.395 | 120.11 | 0.08     |
| 22  | C      | 21 | 20 | 19 | 1.396 | 120.03 | -0.09    |
| 23  | C      | 16 | 2  | 1  | 1.476 | 120.07 | -172.19  |
| 24  | C      | 23 | 16 | 2  | 1.530 | 110.05 | 82.86    |
| 25  | C      | 24 | 23 | 16 | 1.531 | 111.00 | 55.76    |
| 26  | C      | 25 | 24 | 23 | 1.531 | 111.78 | -50.65   |
| 27  | C      | 16 | 2  | 1  | 1.477 | 119.07 | -29.68   |
| 28  | H      | 1  | 2  | 16 | 1.085 | 121.29 | -0.18    |
| 29  | H      | 3  | 2  | 1  | 1.084 | 121.39 | -178.23  |
| 30  | H      | 6  | 5  | 4  | 1.088 | 121.04 | -178.67  |
| 31  | H      | 11 | 8  | 7  | 1.082 | 122.27 | 0.02     |
| 32  | H      | 13 | 12 | 11 | 1.083 | 116.73 | -179.94  |
| 33  | H      | 14 | 13 | 12 | 1.086 | 118.17 | -179.99  |
| 34  | H      | 18 | 17 | 10 | 1.088 | 120.31 | 0.10     |
| 35  | H      | 19 | 18 | 17 | 1.087 | 119.96 | -179.97  |
| 36  | H      | 20 | 19 | 18 | 1.087 | 119.95 | 179.94   |
| 37  | H      | 21 | 20 | 19 | 1.087 | 120.02 | 179.80   |
| 38  | H      | 22 | 21 | 20 | 1.088 | 119.55 | 179.79   |
| 39  | H      | 23 | 16 | 2  | 1.099 | 108.38 | -158.19  |
| 40  | H      | 23 | 16 | 2  | 1.094 | 113.10 | -42.90   |
| 41  | H      | 24 | 23 | 16 | 1.096 | 109.77 | 177.05   |
| 42  | H      | 24 | 23 | 16 | 1.096 | 110.19 | -65.31   |
| 43  | H      | 25 | 24 | 23 | 1.097 | 109.09 | 70.07    |
| 44  | H      | 25 | 24 | 23 | 1.096 | 109.92 | -173.00  |
| 45  | H      | 26 | 25 | 24 | 1.096 | 109.54 | 172.43   |
| 46  | H      | 26 | 25 | 24 | 1.097 | 109.30 | -70.50   |
| 47  | H      | 27 | 16 | 2  | 1.098 | 108.47 | 157.87   |
| 48  | H      | 27 | 16 | 2  | 1.092 | 113.99 | 41.77    |

(Table S2 - continued)

| Jul-Rosol |        |    |    |    |       |        |          | THQ-Rosol |        |    |    |    |       |        |          |
|-----------|--------|----|----|----|-------|--------|----------|-----------|--------|----|----|----|-------|--------|----------|
|           |        |    |    |    |       |        |          |           |        |    |    |    |       |        |          |
| Tag       | Symbol | NA | NB | NC | Bond  | Angle  | Dihedral | Tag       | Symbol | NA | NB | NC | Bond  | Angle  | Dihedral |
| 1         | C      |    |    |    |       |        |          | 1         | C      |    |    |    |       |        |          |
| 2         | C      | 1  |    |    | 1.408 |        |          | 2         | C      | 1  |    |    | 1.438 |        |          |
| 3         | C      | 2  | 1  |    | 1.410 | 118.13 |          | 3         | C      | 2  | 1  |    | 1.407 | 117.82 |          |
| 4         | C      | 3  | 2  | 1  | 1.412 | 120.27 | -2.07    | 4         | C      | 3  | 2  | 1  | 1.396 | 122.16 | 0.64     |
| 5         | C      | 4  | 3  | 2  | 1.393 | 121.63 | 1.58     | 5         | C      | 4  | 3  | 2  | 1.384 | 121.08 | -0.20    |
| 6         | C      | 5  | 4  | 3  | 1.400 | 117.93 | -0.42    | 6         | C      | 5  | 4  | 3  | 1.404 | 117.83 | -0.13    |
| 7         | O      | 4  | 3  | 2  | 1.373 | 116.90 | -178.26  | 7         | O      | 4  | 3  | 2  | 1.369 | 116.31 | 179.93   |
| 8         | C      | 7  | 4  | 3  | 1.385 | 119.95 | -179.77  | 8         | C      | 7  | 4  | 3  | 1.387 | 119.31 | -179.84  |
| 9         | C      | 8  | 7  | 4  | 1.471 | 120.40 | -0.12    | 9         | C      | 8  | 7  | 4  | 1.473 | 120.34 | -0.21    |
| 10        | C      | 9  | 8  | 7  | 1.360 | 120.37 | -0.12    | 10        | C      | 9  | 8  | 7  | 1.361 | 120.44 | -0.01    |
| 11        | C      | 8  | 7  | 4  | 1.340 | 118.22 | 179.89   | 11        | C      | 8  | 7  | 4  | 1.340 | 118.29 | 179.85   |
| 12        | C      | 11 | 8  | 7  | 1.476 | 121.13 | -180.00  | 12        | C      | 11 | 8  | 7  | 1.476 | 121.12 | 179.96   |
| 13        | C      | 12 | 11 | 8  | 1.478 | 117.64 | 0.12     | 13        | C      | 12 | 11 | 8  | 1.478 | 117.65 | 0.05     |
| 14        | C      | 13 | 12 | 11 | 1.340 | 120.64 | -0.12    | 14        | C      | 13 | 12 | 11 | 1.340 | 120.67 | -0.06    |
| 15        | O      | 12 | 11 | 8  | 1.225 | 121.27 | -179.88  | 15        | O      | 12 | 11 | 8  | 1.225 | 121.27 | -179.94  |
| 16        | N      | 2  | 1  | 6  | 1.396 | 120.53 | -178.05  | 16        | N      | 2  | 1  | 6  | 1.402 | 121.64 | -179.56  |
| 17        | C      | 10 | 9  | 8  | 1.485 | 120.21 | -179.97  | 17        | C      | 10 | 9  | 8  | 1.485 | 120.28 | -179.84  |
| 18        | C      | 17 | 10 | 9  | 1.401 | 120.21 | -90.69   | 18        | C      | 17 | 10 | 9  | 1.401 | 120.22 | -90.98   |
| 19        | C      | 18 | 17 | 10 | 1.396 | 120.13 | -179.80  | 19        | C      | 18 | 17 | 10 | 1.396 | 120.13 | -179.64  |
| 20        | C      | 19 | 18 | 17 | 1.395 | 120.03 | 0.12     | 20        | C      | 19 | 18 | 17 | 1.395 | 120.03 | 0.12     |
| 21        | C      | 20 | 19 | 18 | 1.395 | 120.12 | 0.09     | 21        | C      | 20 | 19 | 18 | 1.395 | 120.11 | 0.10     |
| 22        | C      | 21 | 20 | 19 | 1.396 | 120.03 | -0.09    | 22        | C      | 21 | 20 | 19 | 1.396 | 120.03 | -0.09    |
| 23        | C      | 16 | 2  | 1  | 1.459 | 119.39 | 172.07   | 23        | C      | 16 | 2  | 1  | 1.460 | 124.17 | -170.84  |
| 24        | C      | 23 | 16 | 2  | 1.517 | 110.81 | 38.13    | 24        | N      | 1  | 6  | 5  | 1.427 | 120.76 | 179.61   |
| 25        | C      | 3  | 2  | 1  | 1.511 | 119.97 | 179.28   | 25        | C      | 24 | 1  | 6  | 1.469 | 111.67 | 157.20   |
| 26        | C      | 1  | 6  | 5  | 1.510 | 118.33 | -177.37  | 26        | C      | 16 | 2  | 1  | 1.461 | 115.95 | -9.30    |
| 27        | C      | 26 | 1  | 6  | 1.521 | 112.21 | -166.12  | 27        | C      | 24 | 1  | 6  | 1.469 | 119.33 | 12.21    |
| 28        | C      | 16 | 2  | 1  | 1.459 | 118.08 | 17.14    | 28        | C      | 27 | 24 | 1  | 1.523 | 113.62 | -173.30  |
| 29        | H      | 6  | 5  | 4  | 1.088 | 120.32 | -179.57  | 29        | C      | 23 | 16 | 2  | 1.521 | 110.44 | -91.60   |
| 30        | H      | 11 | 8  | 7  | 1.082 | 122.25 | -0.01    | 30        | H      | 3  | 2  | 1  | 1.085 | 120.89 | -178.64  |
| 31        | H      | 13 | 12 | 11 | 1.083 | 116.75 | 179.87   | 31        | H      | 6  | 5  | 4  | 1.084 | 117.41 | -179.97  |
| 32        | H      | 14 | 13 | 12 | 1.086 | 118.16 | 179.95   | 32        | H      | 11 | 8  | 7  | 1.082 | 122.26 | -0.03    |
| 33        | H      | 18 | 17 | 10 | 1.088 | 120.30 | 0.09     | 33        | H      | 13 | 12 | 11 | 1.083 | 116.73 | 179.91   |
| 34        | H      | 19 | 18 | 17 | 1.087 | 119.95 | -179.99  | 34        | H      | 14 | 13 | 12 | 1.086 | 118.17 | 179.94   |
| 35        | H      | 20 | 19 | 18 | 1.087 | 119.94 | 179.95   | 35        | H      | 18 | 17 | 10 | 1.088 | 120.30 | 0.17     |
| 36        | H      | 21 | 20 | 19 | 1.087 | 120.02 | 179.82   | 36        | H      | 19 | 18 | 17 | 1.087 | 119.93 | -179.99  |
| 37        | H      | 22 | 21 | 20 | 1.088 | 119.57 | 179.79   | 37        | H      | 20 | 19 | 18 | 1.087 | 119.93 | 179.98   |
| 38        | H      | 23 | 16 | 2  | 1.096 | 109.76 | 158.38   | 38        | H      | 21 | 20 | 19 | 1.087 | 120.02 | 179.83   |
| 39        | H      | 23 | 16 | 2  | 1.097 | 109.66 | -84.10   | 39        | H      | 22 | 21 | 20 | 1.088 | 119.57 | 179.75   |
| 40        | H      | 24 | 23 | 16 | 1.098 | 109.82 | 61.32    | 40        | H      | 23 | 16 | 2  | 1.096 | 112.10 | 32.85    |
| 41        | H      | 24 | 23 | 16 | 1.095 | 110.41 | 179.47   | 41        | H      | 23 | 16 | 2  | 1.098 | 109.81 | 149.19   |
| 42        | H      | 25 | 3  | 2  | 1.096 | 110.61 | -141.94  | 42        | H      | 25 | 24 | 1  | 1.094 | 111.12 | 170.53   |
| 43        | H      | 25 | 3  | 2  | 1.097 | 108.52 | 99.84    | 43        | H      | 25 | 24 | 1  | 1.098 | 109.95 | -70.69   |
| 44        | H      | 26 | 1  | 6  | 1.096 | 110.11 | -44.52   | 44        | H      | 26 | 16 | 2  | 1.098 | 109.36 | -84.00   |
| 45        | H      | 26 | 1  | 6  | 1.097 | 108.17 | 72.99    | 45        | H      | 26 | 16 | 2  | 1.097 | 109.96 | 158.17   |
| 46        | H      | 27 | 26 | 1  | 1.098 | 109.76 | 74.44    | 46        | H      | 27 | 24 | 1  | 1.096 | 109.69 | -55.59   |
| 47        | H      | 27 | 26 | 1  | 1.095 | 110.03 | -167.73  | 47        | H      | 27 | 24 | 1  | 1.097 | 110.21 | 63.71    |
| 48        | H      | 28 | 16 | 2  | 1.096 | 110.01 | -166.96  | 48        | H      | 28 | 27 | 24 | 1.095 | 109.99 | 170.45   |
| 49        | H      | 28 | 16 | 2  | 1.097 | 110.11 | 75.06    | 49        | H      | 28 | 27 | 24 | 1.094 | 111.57 | -70.83   |
|           |        |    |    |    |       |        |          | 50        | H      | 28 | 27 | 24 | 1.095 | 111.30 | 50.61    |
|           |        |    |    |    |       |        |          | 51        | H      | 29 | 23 | 16 | 1.094 | 110.27 | -178.42  |
|           |        |    |    |    |       |        |          | 52        | H      | 29 | 23 | 16 | 1.095 | 110.87 | -58.71   |
|           |        |    |    |    |       |        |          | 53        | H      | 29 | 23 | 16 | 1.094 | 111.70 | 61.36    |

(Table S2 - continued)

| N-Methyl-THQ-Rosol                                                                |        |    |    |    |       |        |          | N-Propyl-THQ-Rosol                                                                 |        |    |    |    |       |        |          |
|-----------------------------------------------------------------------------------|--------|----|----|----|-------|--------|----------|------------------------------------------------------------------------------------|--------|----|----|----|-------|--------|----------|
| 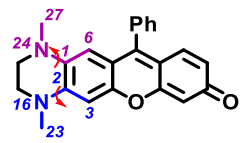 |        |    |    |    |       |        |          |  |        |    |    |    |       |        |          |
| Tag                                                                               | Symbol | NA | NB | NC | Bond  | Angle  | Dihedral | Tag                                                                                | Symbol | NA | NB | NC | Bond  | Angle  | Dihedral |
| 1                                                                                 | C      |    |    |    |       |        |          | 1                                                                                  | C      |    |    |    |       |        |          |
| 2                                                                                 | C      | 1  |    |    | 1.431 |        |          | 2                                                                                  | C      | 1  |    |    | 1.435 |        |          |
| 3                                                                                 | C      | 2  | 1  |    | 1.404 | 118.21 |          | 3                                                                                  | C      | 2  | 1  |    | 1.407 | 117.80 |          |
| 4                                                                                 | C      | 3  | 2  | 1  | 1.397 | 121.64 | -1.09    | 4                                                                                  | C      | 3  | 2  | 1  | 1.397 | 121.99 | 2.38     |
| 5                                                                                 | C      | 4  | 3  | 2  | 1.386 | 121.17 | 0.29     | 5                                                                                  | C      | 4  | 3  | 2  | 1.384 | 121.11 | -0.65    |
| 6                                                                                 | C      | 5  | 4  | 3  | 1.404 | 117.89 | 0.20     | 6                                                                                  | C      | 5  | 4  | 3  | 1.403 | 117.80 | -1.01    |
| 7                                                                                 | O      | 4  | 3  | 2  | 1.369 | 116.28 | -179.78  | 7                                                                                  | O      | 4  | 3  | 2  | 1.369 | 116.35 | -179.36  |
| 8                                                                                 | C      | 7  | 4  | 3  | 1.387 | 119.31 | 179.73   | 8                                                                                  | C      | 7  | 4  | 3  | 1.387 | 119.30 | -179.77  |
| 9                                                                                 | C      | 8  | 7  | 4  | 1.473 | 120.37 | 0.20     | 9                                                                                  | C      | 8  | 7  | 4  | 1.473 | 120.36 | 0.24     |
| 10                                                                                | C      | 9  | 8  | 7  | 1.361 | 120.47 | 0.02     | 10                                                                                 | C      | 9  | 8  | 7  | 1.360 | 120.45 | -0.36    |
| 11                                                                                | C      | 8  | 7  | 4  | 1.340 | 118.27 | -179.85  | 11                                                                                 | C      | 8  | 7  | 4  | 1.340 | 118.28 | -179.88  |
| 12                                                                                | C      | 11 | 8  | 7  | 1.476 | 121.12 | -179.97  | 12                                                                                 | C      | 11 | 8  | 7  | 1.476 | 121.12 | -179.80  |
| 13                                                                                | C      | 12 | 11 | 8  | 1.478 | 117.65 | -0.04    | 13                                                                                 | C      | 12 | 11 | 8  | 1.478 | 117.66 | 0.15     |
| 14                                                                                | C      | 13 | 12 | 11 | 1.340 | 120.67 | 0.05     | 14                                                                                 | C      | 13 | 12 | 11 | 1.340 | 120.67 | -0.15    |
| 15                                                                                | O      | 12 | 11 | 8  | 1.225 | 121.27 | 179.96   | 15                                                                                 | O      | 12 | 11 | 8  | 1.225 | 121.26 | -179.95  |
| 16                                                                                | N      | 2  | 1  | 6  | 1.398 | 120.96 | 178.62   | 16                                                                                 | N      | 2  | 1  | 6  | 1.411 | 121.31 | 178.81   |
| 17                                                                                | C      | 10 | 9  | 8  | 1.485 | 120.31 | 179.84   | 17                                                                                 | C      | 10 | 9  | 8  | 1.485 | 120.39 | 179.73   |
| 18                                                                                | C      | 17 | 10 | 9  | 1.401 | 120.22 | -89.91   | 18                                                                                 | C      | 17 | 10 | 9  | 1.401 | 120.17 | -91.11   |
| 19                                                                                | C      | 18 | 17 | 10 | 1.396 | 120.14 | -179.75  | 19                                                                                 | C      | 18 | 17 | 10 | 1.396 | 120.14 | -179.45  |
| 20                                                                                | C      | 19 | 18 | 17 | 1.395 | 120.03 | 0.15     | 20                                                                                 | C      | 19 | 18 | 17 | 1.395 | 120.02 | 0.12     |
| 21                                                                                | C      | 20 | 19 | 18 | 1.395 | 120.11 | 0.10     | 21                                                                                 | C      | 20 | 19 | 18 | 1.395 | 120.11 | 0.10     |
| 22                                                                                | C      | 21 | 20 | 19 | 1.396 | 120.03 | -0.11    | 22                                                                                 | C      | 21 | 20 | 19 | 1.396 | 120.03 | -0.09    |
| 23                                                                                | C      | 16 | 2  | 1  | 1.448 | 123.60 | 169.49   | 23                                                                                 | C      | 16 | 2  | 1  | 1.464 | 122.13 | -165.45  |
| 24                                                                                | N      | 1  | 6  | 5  | 1.400 | 120.48 | -179.10  | 24                                                                                 | N      | 1  | 6  | 5  | 1.400 | 120.37 | -177.69  |
| 25                                                                                | C      | 24 | 1  | 6  | 1.463 | 116.93 | 169.04   | 25                                                                                 | C      | 24 | 1  | 6  | 1.462 | 116.21 | 168.09   |
| 26                                                                                | C      | 16 | 2  | 1  | 1.460 | 116.04 | -16.14   | 26                                                                                 | C      | 16 | 2  | 1  | 1.467 | 114.25 | -16.25   |
| 27                                                                                | C      | 24 | 1  | 6  | 1.450 | 122.92 | -18.24   | 27                                                                                 | C      | 24 | 1  | 6  | 1.459 | 125.06 | -15.45   |
| 28                                                                                | H      | 3  | 2  | 1  | 1.085 | 120.59 | 178.39   | 28                                                                                 | C      | 27 | 24 | 1  | 1.529 | 110.81 | -76.37   |
| 29                                                                                | H      | 6  | 5  | 4  | 1.085 | 118.59 | -179.22  | 29                                                                                 | C      | 23 | 16 | 2  | 1.530 | 110.04 | -94.92   |
| 30                                                                                | H      | 11 | 8  | 7  | 1.082 | 122.26 | 0.02     | 30                                                                                 | C      | 28 | 27 | 24 | 1.520 | 111.43 | -179.36  |
| 31                                                                                | H      | 13 | 12 | 11 | 1.083 | 116.73 | -179.94  | 31                                                                                 | C      | 29 | 23 | 16 | 1.520 | 111.47 | 179.91   |
| 32                                                                                | H      | 14 | 13 | 12 | 1.086 | 118.17 | -179.96  | 32                                                                                 | H      | 3  | 2  | 1  | 1.084 | 120.97 | -177.45  |
| 33                                                                                | H      | 18 | 17 | 10 | 1.088 | 120.28 | 0.14     | 33                                                                                 | H      | 6  | 5  | 4  | 1.084 | 118.02 | -178.40  |
| 34                                                                                | H      | 19 | 18 | 17 | 1.087 | 119.95 | -179.94  | 34                                                                                 | H      | 11 | 8  | 7  | 1.082 | 122.26 | 0.13     |
| 35                                                                                | H      | 20 | 19 | 18 | 1.087 | 119.95 | 179.96   | 35                                                                                 | H      | 13 | 12 | 11 | 1.083 | 116.73 | 179.83   |
| 36                                                                                | H      | 21 | 20 | 19 | 1.087 | 120.04 | 179.77   | 36                                                                                 | H      | 14 | 13 | 12 | 1.086 | 118.19 | 179.95   |
| 37                                                                                | H      | 22 | 21 | 20 | 1.088 | 119.58 | 179.70   | 37                                                                                 | H      | 18 | 17 | 10 | 1.088 | 120.29 | 0.35     |
| 38                                                                                | H      | 23 | 16 | 2  | 1.095 | 111.20 | -49.28   | 38                                                                                 | H      | 19 | 18 | 17 | 1.087 | 119.95 | -179.99  |
| 39                                                                                | H      | 23 | 16 | 2  | 1.095 | 110.68 | 72.22    | 39                                                                                 | H      | 20 | 19 | 18 | 1.087 | 119.95 | 179.96   |
| 40                                                                                | H      | 23 | 16 | 2  | 1.095 | 111.39 | -168.29  | 40                                                                                 | H      | 21 | 20 | 19 | 1.087 | 120.03 | 179.76   |
| 41                                                                                | H      | 25 | 24 | 1  | 1.096 | 111.07 | 159.13   | 41                                                                                 | H      | 22 | 21 | 20 | 1.088 | 119.58 | 179.61   |
| 42                                                                                | H      | 25 | 24 | 1  | 1.097 | 108.62 | -83.40   | 42                                                                                 | H      | 23 | 16 | 2  | 1.096 | 112.04 | 30.02    |
| 43                                                                                | H      | 26 | 16 | 2  | 1.097 | 109.15 | -76.87   | 43                                                                                 | H      | 23 | 16 | 2  | 1.098 | 109.72 | 146.09   |
| 44                                                                                | H      | 26 | 16 | 2  | 1.096 | 110.94 | 165.27   | 44                                                                                 | H      | 25 | 24 | 1  | 1.096 | 110.85 | 160.58   |
| 45                                                                                | H      | 27 | 24 | 1  | 1.095 | 111.61 | -171.96  | 45                                                                                 | H      | 25 | 24 | 1  | 1.097 | 108.90 | -81.77   |
| 46                                                                                | H      | 27 | 24 | 1  | 1.095 | 111.01 | -52.45   | 46                                                                                 | H      | 26 | 16 | 2  | 1.098 | 109.53 | -76.58   |
| 47                                                                                | H      | 27 | 24 | 1  | 1.095 | 110.83 | 69.11    | 47                                                                                 | H      | 26 | 16 | 2  | 1.097 | 109.83 | 165.58   |
|                                                                                   |        |    |    |    |       |        |          | 48                                                                                 | H      | 27 | 24 | 1  | 1.096 | 111.46 | 48.11    |
|                                                                                   |        |    |    |    |       |        |          | 49                                                                                 | H      | 27 | 24 | 1  | 1.098 | 109.53 | 163.46   |
|                                                                                   |        |    |    |    |       |        |          | 50                                                                                 | H      | 28 | 27 | 24 | 1.097 | 109.81 | -58.11   |
|                                                                                   |        |    |    |    |       |        |          | 51                                                                                 | H      | 28 | 27 | 24 | 1.096 | 110.56 | 59.34    |
|                                                                                   |        |    |    |    |       |        |          | 52                                                                                 | H      | 29 | 23 | 16 | 1.097 | 109.65 | -58.99   |
|                                                                                   |        |    |    |    |       |        |          | 53                                                                                 | H      | 29 | 23 | 16 | 1.096 | 110.71 | 58.26    |
|                                                                                   |        |    |    |    |       |        |          | 54                                                                                 | H      | 30 | 28 | 27 | 1.094 | 110.26 | 179.77   |
|                                                                                   |        |    |    |    |       |        |          | 55                                                                                 | H      | 30 | 28 | 27 | 1.095 | 110.95 | -60.53   |
|                                                                                   |        |    |    |    |       |        |          | 56                                                                                 | H      | 30 | 28 | 27 | 1.095 | 111.03 | 60.02    |
|                                                                                   |        |    |    |    |       |        |          | 57                                                                                 | H      | 31 | 29 | 23 | 1.094 | 110.26 | 179.62   |
|                                                                                   |        |    |    |    |       |        |          | 58                                                                                 | H      | 31 | 29 | 23 | 1.095 | 110.96 | -60.66   |
|                                                                                   |        |    |    |    |       |        |          | 59                                                                                 | H      | 31 | 29 | 23 | 1.095 | 111.03 | 59.88    |

### 3. Chemical Synthesis

Chemical shifts ( $\delta$ ) are expressed in ppm, and coupling constants ( $J$ ) in hertz (Hz). Chemical shifts are reported using  $\text{CDCl}_3$  or the otherwise specified deuterated NMR solvent peak as the internal reference.

**General Synthesis A: Friedel-Crafts Acylation.** To an oven-dried round bottom flask was added compound **1** (1 eq) and dry  $\text{CH}_2\text{Cl}_2$  (15 mL). The solution was degassed with  $\text{N}_2$  and cooled to  $0^\circ\text{C}$ . Benzoyl chloride (1 eq) was added with continuous  $\text{N}_2$  bubbling.  $\text{AlCl}_3$  (1 eq) was quickly added while maintaining positive  $\text{N}_2$  pressure into the flask (color turned bright red). The flask was removed from the ice bath and continued stirring under a blanket of  $\text{N}_2$  at room temp for 3 hrs. Dilute HCl (1 M, 4 mL) was added into the reaction flask and stirred for one minute. The reaction mixture was poured into a separatory funnel and the crude material was extracted with DCM (50 mL x 3). The organic fractions were combined, washed with brine, dried over  $\text{MgSO}_4$ , and the solvent removed *in vacuo*. Purification by column chromatography yielded both the acylated phenol intermediate (i.e., compound **2**) and the acylated methoxy-intermediate (not shown) as a byproduct. To preserve starting material **1**, a subsequent demethylation step was performed on the respective acylated methoxy-intermediate to afford additional compound **2**. For efficiently obtaining additional compound **2**, the acylated methoxy-intermediate was demethylated according using the following procedure: The intermediate (1 eq) was added to an oven-dried round bottom flask. The flask was purged with  $\text{N}_2$ . Then, 5 mL of dry DCM was added. The flask was cooled to  $-78^\circ\text{C}$  and  $\text{BBr}_3$  (1M in DCM, 1.3 eq) was slowly syringed in. The solution turned red. The reaction stirred at  $-78^\circ\text{C}$  for 2.5 hrs and then at  $0^\circ\text{C}$  for 0.5 hrs. 5 mL of cold saturated sodium bicarbonate was slowly syringed into the reaction flask. The flask contents were sonicated and then poured into a separatory funnel. The crude product was extracted with DCM (50 mL x 3). The organic layers were combined, washed with brine, dried over  $\text{MgSO}_4$ , and the solvent removed *in vacuo*. \*Note: synthesis of compound **4** from **3** involved 3 eq. of aluminum chloride, which efficiently both acylated and demethylated **3** during the reaction such that a subsequent demethylation of its acylated methoxy-intermediate, as was done for preparing additional compound **2**, was unnecessary.

**General Synthesis B: Condensation/Cyclization.** Into a small sealed tube was added compound **2** or **4** (1 eq), resorcinol (1.5 eq), and methanesulfonic acid (1 mL). The mixture stirred at  $100^\circ\text{C}$  for 3 hrs. The oil was rinsed from the exterior of the tube and 3 mL of DI water was added to the reaction mixture. The red solution turned cloudy. The material was poured into a separatory funnel and extracted with DCM (50 mL x 5). The organic fractions were combined, dried over  $\text{MgSO}_4$ , and the solvent removed *in vacuo*. Purification was performed via column chromatography.

**Compound 2-Me.** General Synthesis A. The acylated methoxy-intermediate was purified by column chromatography (9:1 hexanes:ethyl acetate) and yielded the product as a yellow solid (223 mg, 33%):  $^1\text{H}$  NMR (400 MHz,  $\text{CDCl}_3$ )  $\delta$  (ppm) 7.70-7.75 (m, 2H), 7.45-7.51 (m, 1H), 7.43 (d, 1H,  $J = 8.7$  Hz), 7.36-7.43 (m, 2H), 6.30 (dd, 1H,  $J = 2.3, 8.7$  Hz), 6.16 (d, 1H,  $J = 2.3$  Hz), 3.72 (s, 3H), 3.06 (s, 6H);  $^{13}\text{C}$  NMR (125 MHz,  $\text{CDCl}_3$ )  $\delta$  (ppm) 195.3, 160.7, 154.3, 140.4, 133.7, 131.6, 129.6, 127.9. HRMS calculated for  $\text{C}_{16}\text{H}_{17}\text{NO}_2\text{Na}$  ( $\text{M} + \text{Na}^+$ ): 278.1152. Found: 278.1149. Compound **2-Me** was purified by column chromatography (9:1 hexanes:ethyl acetate) yielded the product as a yellow oil (209 mg, 89%):  $^1\text{H}$  NMR (400 MHz,  $\text{CDCl}_3$ )  $\delta$  (ppm) 12.96 (s, 1H), 7.57-7.63 (m, 2H), 7.48-7.53 (m, 1H), 7.42-7.48 (m, 2H), 7.36-7.41 (m, 1H), 6.13-6.18 (m, 2H), 3.04 (s, 6H);  $^{13}\text{C}$  NMR (125 MHz,  $\text{CDCl}_3$ )  $\delta$  (ppm) 198.3, 165.9, 155.9, 138.9, 135.3, 130.8, 128.7, 128.2, 109.3, 103.8, 97.9, 40.0. HRMS calculated for  $\text{C}_{15}\text{H}_{16}\text{NO}_2$  ( $\text{M} + \text{H}^+$ ): 242.1176. Found: 242.1177.

**Me-Rosol.** General Synthesis B. Purification via column chromatography (9:1 DCM:ethyl acetate) yielded the product as a red solid (131 mg, 69%):  $^1\text{H}$  NMR (400 MHz,  $\text{CDCl}_3$ )  $\delta$  (ppm) 7.51-7.57 (m, 3H), 7.27-7.33 (m, 2H), 7.00-7.06 (m, 2H), 6.49-6.55 (m, 3H), 6.38 (d, 1H,  $J = 2.0$  Hz), 3.10 (s, 6H);  $^{13}\text{C}$  NMR (125 MHz,  $\text{CDCl}_3$ )  $\delta$  (ppm) 184.9, 159.1, 155.3, 154.1, 150.8, 133.2, 130.7, 129.8, 129.4, 129.3, 128.6, 128.0, 115.0, 110.7, 110.0, 105.2, 96.9, 40.2. HRMS calculated for  $\text{C}_{21}\text{H}_{18}\text{NO}_2$  ( $\text{M} + \text{H}^+$ ): 316.1332. Found: 316.1329.

**Compound 2-Et.** General Synthesis A. The acylated methoxy-intermediate was purified by column chromatography (9:1 hexanes:ethyl acetate) and yielded the product as a yellow oil (168 mg, 35%):  $^1\text{H}$  NMR (400 MHz,  $\text{CDCl}_3$ )  $\delta$  (ppm) 7.71-7.75 (m, 2H), 7.44-7.49 (m, 1H), 7.42 (d, 1H,  $J = 8.8$  Hz), 7.36-7.41 (m, 2H), 6.26 (dd, 1H,  $J = 2.4, 8.8$  Hz), 6.14 (d, 1H,  $J = 2.4$  Hz), 3.70 (s, 3H), 3.42 (q, 4H,  $J = 7.1$  Hz), 1.22 (t, 6H,  $J = 7.1$  Hz);  $^{13}\text{C}$  NMR (125 MHz,  $\text{CDCl}_3$ )  $\delta$  (ppm) 195.0, 161.2, 152.0, 140.6, 134.2, 131.3, 129.5, 127.8, 115.4, 103.4, 94.2, 55.5, 44.7, 12.7. HRMS calculated for  $\text{C}_{18}\text{H}_{21}\text{NO}_2\text{Na}$  ( $\text{M} + \text{Na}^+$ ): 306.1465. Found: 306.1462. Compound **2-Et** was purified via column chromatography (1:1 DCM:hexanes) and yielded the

product as a yellow oil (295 mg, 92%):  $^1\text{H}$  NMR (400 MHz,  $\text{CDCl}_3$ )  $\delta$  (ppm) 13.03 (s, 1H), 7.58-7.63 (m, 2H), 7.42-7.53 (m, 3H), 7.37 (d, 1H,  $J = 9.1$  Hz), 6.12-6.17 (m, 2H), 3.39 (q, 4H,  $J = 7.1$  Hz), 1.20 (t, 6H,  $J = 7.1$  Hz);  $^{13}\text{C}$  NMR (125 MHz,  $\text{CDCl}_3$ )  $\delta$  (ppm) 197.9, 166.3, 153.9, 139.0, 135.6, 130.7, 128.7, 128.2, 108.9, 103.6, 97.2, 44.7, 12.7. HRMS calculated for  $\text{C}_{17}\text{H}_{19}\text{NO}_2\text{Na}$  ( $\text{M} + \text{Na}^+$ ): 292.1308. Found: 292.1309.

**Et-Rosol.** General Synthesis B. Purification by column chromatography (9:1 DCM:ethyl acetate) yielded the product as a red solid (11.4 mg, 8%):  $^1\text{H}$  NMR (400 MHz, MeOD)  $\delta$  (ppm) 7.60-7.66 (m, 3H), 7.38-7.44 (m, 2H), 7.20 (d, 1H,  $J = 9.4$  Hz), 7.16 (d, 1H,  $J = 9.5$  Hz), 6.87 (dd, 1H,  $J = 2.5$  Hz, 9.4 Hz), 6.81 (d, 1H,  $J = 2.5$  Hz), 6.56 (dd, 1H,  $J = 2.2$  Hz, 9.5 Hz), 6.48 (d, 1H,  $J = 2.2$  Hz), 3.59 (q, 4H,  $J = 7.1$  Hz), 1.26 (t, 6H,  $J = 7.1$  Hz);  $^{13}\text{C}$  NMR (125 MHz, MeOD)  $\delta$  (ppm) 185.2, 161.1, 158.2, 156.5, 155.4, 134.3, 132.7, 132.1, 130.8, 130.6, 129.8, 126.5, 114.8, 113.3, 112.4, 105.0, 97.3, 46.3, 12.8. HRMS calculated for  $\text{C}_{23}\text{H}_{21}\text{NO}_2$  ( $\text{M} + \text{H}^+$ ): 344.1645. Found: 344.1642.

**Compound 2-Pip.** General Synthesis A. The acylated methoxy-intermediate was purified by column chromatography (9:1 hexanes:ethyl acetate) and yielded the product as a yellow oil (54 mg, 15%):  $^1\text{H}$  NMR (400 MHz,  $\text{CDCl}_3$ )  $\delta$  (ppm) 7.73-7.77 (m, 2H), 7.46-7.52 (m, 1H), 7.36-7.42 (m, 2H), 7.39 (d, 1H,  $J = 8.6$  Hz), 6.50 (dd, 1H,  $J = 2.3$ , 8.6 Hz), 6.40 (d, 1H,  $J = 2.3$  Hz), 3.70 (s, 3H), 3.29-3.36 (m, 4H), 1.60-1.75 (m, 6H).  $^{13}\text{C}$  NMR (125 MHz,  $\text{CDCl}_3$ )  $\delta$  (ppm) 195.3, 160.4, 155.5, 140.0, 133.1, 131.8, 129.7, 127.9, 118.3, 106.8, 98.2, 55.6, 49.4, 25.7, 24.5. HRMS calculated for  $\text{C}_{19}\text{H}_{21}\text{NO}_2\text{Na}$  ( $\text{M} + \text{Na}^+$ ): 318.1465. Found: 318.1465. Compound **2-Pip** was purified via column chromatography (9:1 hexanes:EtOAc) and yielded the product as a yellow oil (129 mg, 94%):  $^1\text{H}$  NMR (400 MHz,  $\text{CDCl}_3$ )  $\delta$  (ppm) 12.85 (s, 1H), 7.59-7.63 (m, 2H), 7.50-7.55 (m, 1H), 7.44-7.49 (m, 2H), 7.39 (d, 1H,  $J = 9.1$  Hz), 6.35 (d, 1H,  $J = 2.6$  Hz), 6.31 (dd, 1H,  $J = 2.6$ , 9.1 Hz), 3.38-3.44 (m, 4H), 1.60-1.71 (m, 6H);  $^{13}\text{C}$  NMR (125 MHz,  $\text{CDCl}_3$ )  $\delta$  (ppm) 198.3, 166.3, 156.3, 138.3, 135.4, 131.0, 128.8, 128.3, 109.9, 105.3, 99.7, 48.2, 25.4, 24.6; HRMS calculated for  $\text{C}_{18}\text{H}_{19}\text{NO}_2\text{Na}$  ( $\text{M} + \text{Na}^+$ ): 304.1308. Found: 304.1309.

**Pip-Rosol.** General Synthesis B. Purification via column chromatography (9:1 DCM:MeOH) yielded the product as a red solid (41 mg, 25%):  $^1\text{H}$  NMR (400 MHz,  $\text{CDCl}_3$ )  $\delta$  (ppm) 7.49-7.56 (m, 3H), 7.28-7.34 (m, 2H), 7.00-7.07 (m, 2H), 6.73 (d, 1H,  $J = 2.5$  Hz), 6.69 (dd, 1H,  $J = 2.5$ , 9.1 Hz), 6.53 (dd, 1H,  $J = 2.0$ , 9.6 Hz), 6.42 (d, 1H,  $J = 2.0$  Hz), 3.38-3.51 (m, 4H), 1.58-1.75 (m, 6H);  $^{13}\text{C}$  NMR (125 MHz,  $\text{CDCl}_3$ )  $\delta$  (ppm) 185.1, 159.2, 155.7, 154.5, 150.6, 133.3, 130.9, 130.0, 129.5, 129.3, 128.6, 128.3, 115.6, 111.6, 111.4, 105.3, 98.8, 48.5, 25.4, 24.4. HRMS calculated for  $\text{C}_{24}\text{H}_{21}\text{NO}_2$  ( $\text{M} + \text{H}^+$ ): 356.1645. Found: 356.1643.

**Compound 2-Jul.** General Synthesis A. The acylated methoxy-intermediate was purified by column chromatography (9:1 hexanes:EtOAc) and yielded the product as a yellow oil (249 mg, 33%):  $^1\text{H}$  NMR (400 MHz,  $\text{CDCl}_3$ )  $\delta$  (ppm) 7.75-7.81 (m, 2H), 7.46-7.53 (m, 1H), 7.37-7.44 (m, 2H), 7.02 (s, 1H), 3.51 (s, 3H), 3.20-3.27 (m, 4H), 2.76 (t, 2H,  $J = 6.5$  Hz), 2.69 (t, 2H,  $J = 6.4$  Hz), 1.91-1.99 (m, 4H);  $^{13}\text{C}$  NMR (125 MHz,  $\text{CDCl}_3$ )  $\delta$  (ppm) 195.5, 157.0, 147.0, 140.1, 131.7, 130.3, 129.8, 127.9, 118.4, 115.9, 113.5, 61.6, 50.1, 49.7, 27.5, 21.8, 21.3, 21.3. HRMS calculated for  $\text{C}_{20}\text{H}_{21}\text{NO}_2\text{Na}$  ( $\text{M} + \text{Na}^+$ ): 330.1465. Found: 330.1462. Compound **2-Jul** was purified via column chromatography (9:1 hexanes:EtOAc) and yielded the product as a yellow oil (25.8 mg, 27%):  $^1\text{H}$  NMR (400 MHz,  $\text{CDCl}_3$ )  $\delta$  (ppm) 13.27 (s, 1H), 7.56-7.60 (m, 2H), 7.42-7.52 (m, 3H), 6.95 (s, 1H), 3.23-3.31 (m, 4H,  $J = 5.8$  Hz), 2.75 (t, 2H,  $J = 6.4$  Hz), 2.57 (t, 2H,  $J = 6.3$  Hz), 1.87-2.00 (m, 4H);  $^{13}\text{C}$  NMR (125 MHz,  $\text{CDCl}_3$ )  $\delta$  (ppm) 197.8, 161.5, 149.2, 139.5, 131.3, 130.4, 128.7, 128.2, 112.6, 108.4, 105.9, 50.3, 49.9, 27.5, 21.9, 20.9, 20.1. HRMS calculated for  $\text{C}_{19}\text{H}_{19}\text{NO}_2\text{Na}$  ( $\text{M} + \text{Na}^+$ ): 316.1308. Found: 316.1308.

**Jul-Rosol.** General Synthesis B. Purification of the crude material via column chromatography (10:1 DCM:MeOH) yielded the product as a dark red solid (4.7 mg, 4%):  $^1\text{H}$  NMR (400 MHz, MeOD)  $\delta$  (ppm) 7.60-7.66 (m, 1H), 7.35-7.42 (m, 2H), 7.16 (d, 1H,  $J = 8.0$  Hz), 6.84 (s, 1H), 6.62-6.67 (m, 2H), 3.46-3.57 (m, 4H), 3.02 (t, 2H,  $J = 6.4$  Hz), 2.68 (t, 2H,  $J = 6.4$  Hz), 2.07 (qn, 2H,  $J = 6.0$  Hz);  $^{13}\text{C}$  NMR (125 MHz,  $\text{CDCl}_3$ )  $\delta$  (ppm) 160.0, 156.5, 153.6, 152.5, 134.3, 132.3, 130.8, 130.6, 129.8, 127.9, 125.0, 123.8, 114.2, 113.7, 106.6, 104.4, 51.9, 51.4, 28.6, 21.8, 20.8. HRMS calculated for  $\text{C}_{25}\text{H}_{21}\text{NO}_2$  ( $\text{M} + \text{H}^+$ ): 368.1645. Found: 368.1641.

**Compound 4.** General Synthesis A. Purification via column chromatography (8:2 hexanes:EtOAc) yielded the product as a yellow solid (203 mg, 48%):  $^1\text{H}$  NMR (400 MHz,  $\text{CDCl}_3$ )  $\delta$  (ppm) 12.94 (s, 1H), 7.61-7.66 (m, 2H), 7.42-7.52 (m, 3H), 6.59 (s, 1H), 6.13 (s, 1H), 3.47-3.53 (m, 2H), 3.40 (q, 2H,  $J = 7.1$  Hz), 3.09-3.13 (m, 2H), 3.06 (q, 2H,  $J = 7.1$  Hz), 1.22 (t, 3H,  $J = 7.1$  Hz), 1.06 (t, 3H,  $J = 7.1$  Hz);  $^{13}\text{C}$  NMR (125 MHz,  $\text{CDCl}_3$ )  $\delta$  (ppm) 197.2, 161.2, 144.5, 139.4, 130.5, 128.6, 128.0,



127.1, 113.8, 108.1, 96.4, 47.8, 45.7, 45.4, 45.0, 10.7, 10.1. HRMS calculated for  $C_{19}H_{22}N_2O_2$  ( $M^+$ ): 309.1598. Found: 309.1597.

**THQ-Rosol.** General Synthesis B. Purification via column chromatography (9:1  $CHCl_3$ :MeOH) yielded the product as a yellow oil (49%):  $^1H$  NMR (400 MHz,  $CDCl_3$ )  $\delta$  (ppm) 7.49-7.55 (m, 3H), 7.28-7.34 (m, 2H), 7.03 (d, 1H,  $J = 9.6$  Hz), 6.58 (dd, 1H,  $J = 2.1, 9.6$  Hz), 6.52 (s, 1H), 6.48 (d, 1H  $J = 2.1$  Hz), 6.10 (s, 1H), 3.51-3.56 (m, 2H), 3.47 (q, 2H,  $J = 7.2$  Hz), 3.16-3.21 (m, 2H), 3.04 (q, 2H,  $J = 7.1$  Hz), 1.25 (t, 3H,  $J = 7.2$  Hz), 0.96 (t, 3H,  $J = 7.1$  Hz);  $^{13}C$  NMR (125 MHz,  $CDCl_3$ )  $\delta$  (ppm) 183.6, 158.9, 151.1, 150.4, 143.3, 134.0, 132.7, 130.0, 129.4, 129.2, 128.5, 127.5, 114.5, 111.5, 105.9, 104.4, 95.3, 47.7, 46.4, 45.4, 44.6, 10.8, 9.6. HRMS calculated for  $C_{25}H_{24}N_2O_2$  ( $M + H^+$ ): 385.1911. Found: 385.1910.

## 4. UV/Vis & Fluorescence Spectroscopy

**Spectroscopy.** The PTI Quantamaster 400 (QM-400) spectrofluorometer is equipped with an extended wavelength range (185-900 nm) Shimadzu 928 photomultiplier tube (PMT), a 1200 l/mm grating blazed at 500 nm, and an OBB PowerArc™ 75W Xenon arc lamp (~7500 mW total power output), wherein data was collected using the proprietary PTI *FelixGX*® 4.3.6904.8391 software package. To prepare dye solutions, an appropriate volume of a 1 mg/mL DMSO stock dye solution of each non-NIR fluorescent rosol dye and **THQ-Rosol** was diluted to volume with buffer (50 mM phosphate, 150 mM NaCl, pH 7.4) after addition of negligible volume of co-solvent (DMSO), if needed. Fluorescence spectra of each rosol dye were obtained by exciting each fluorescent rosol dye solution (at 25°C) at their respective wavelength of maximum absorbance and the resultant emission was collected from +10 nm beyond the respective excitation wavelength to 900 nm. The emission spectra of a buffer blank for each fluorescent dye was obtained and automatically subtracted from its respective emission spectrum to account for any Raman scattering and noise from the buffer, wherein the excitation and emission background subtraction feature provided in the software was enabled to account for both any differences in the varying quantum efficiency of the lamp source at each respective excitation wavelength and any dark noise from the PMT upon monitoring the fluorescence emission.

**Photostability.** Photostability studies on the fluorescent rosol dyes were performed by photoirradiating solutions of each dye for 1800 s at their respective wavelength of maximum absorbance and measuring the fluorescence intensity at their respective wavelength of maximum emission. 2 points per second were obtained without pause.

**Quantum Yield.** The quantum yields of fluorescence ( $\Phi_{fl}$ ) were determined by using erythrosine B as a reference fluorescent dye ( $\Phi_{fl} = 0.02$ ). Quantum yields were calculated using Eq. S1. The excitation wavelength was 515 nm (with 2 nm excitation and emission slits), wherein the absorbance at 515 nm was less than 0.1 for each fluorescent rosol dye and erythrosine B.<sup>1</sup>

$$\Phi_S = \Phi_R \left[ \frac{I_S}{I_R} \right] \left[ \frac{A_R}{A_S} \right] \left[ \frac{(\eta_S)^2}{(\eta_R)^2} \right] \quad (\text{Eq. S1})$$

$\Phi_S$  = relative quantum yield of sample

$\Phi_R$  = absolute quantum yield of reference fluorescent dye

$\eta_S$  = refractive index of the sample solvent

$\eta_R$  = refractive index of the reference solvent

$A_S$  = absorbance of sample

$A_R$  = absorbance of reference fluorescence dye

$I_S$  = fluorescence intensity of sample

$I_R$  = fluorescence intensity of reference fluorescent dye

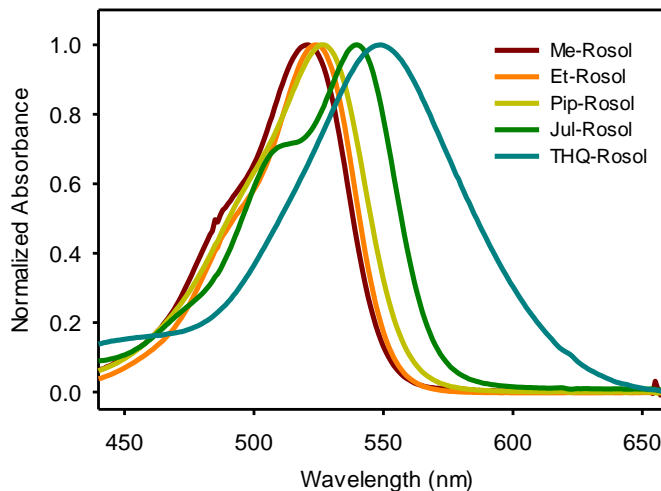

**Figure S3. Absorption Spectra.** Normalized absorbance spectra of fluorescent rosol dyes (20  $\mu\text{M}$ ) in buffer (50 mM phosphate, 150 mM NaCl, pH 7.4).

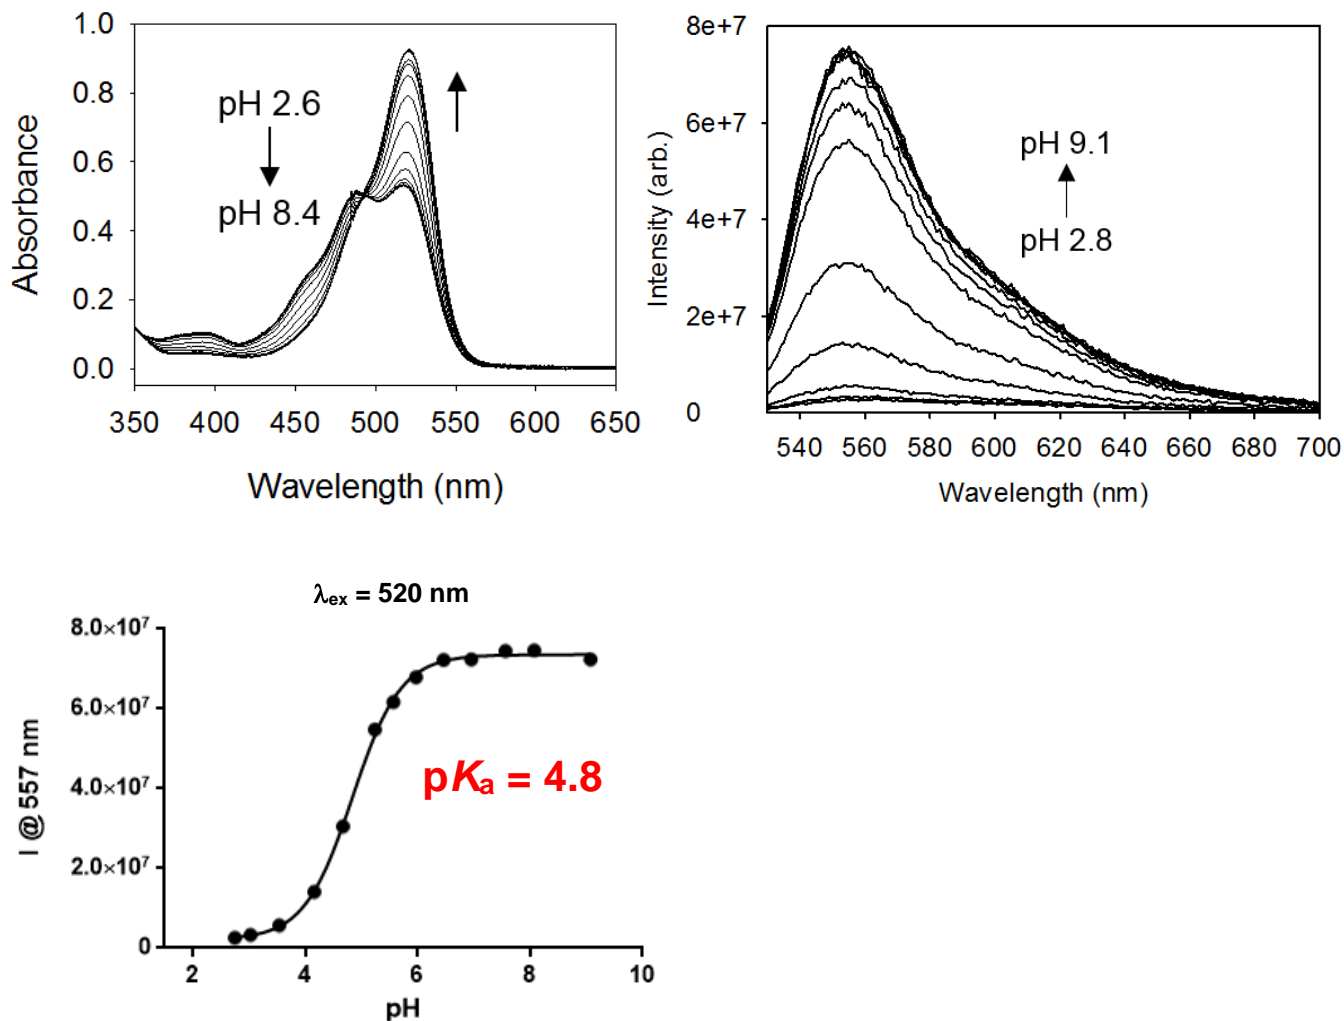

**Figure S4. pH Titration of Me-Rosol (20  $\mu\text{M}$ ) in buffer** (50 mM phosphate, 150 mM NaCl, pH 7.4). Various aliquot volumes of different NaOH solutions having a concentration of either 1, 4, or 8 M were added to the non-NIR fluorescent rosol dye to adjust the pH. A plot of the pH versus the intensity produces a sigmoidal curve where the inflection point represents the  $pK_a$ . The non-NIR fluorescent rosol dye was excited at its maximum absorbance wavelength ( $\lambda_{\text{abs}} = 520 \text{ nm}$ ).

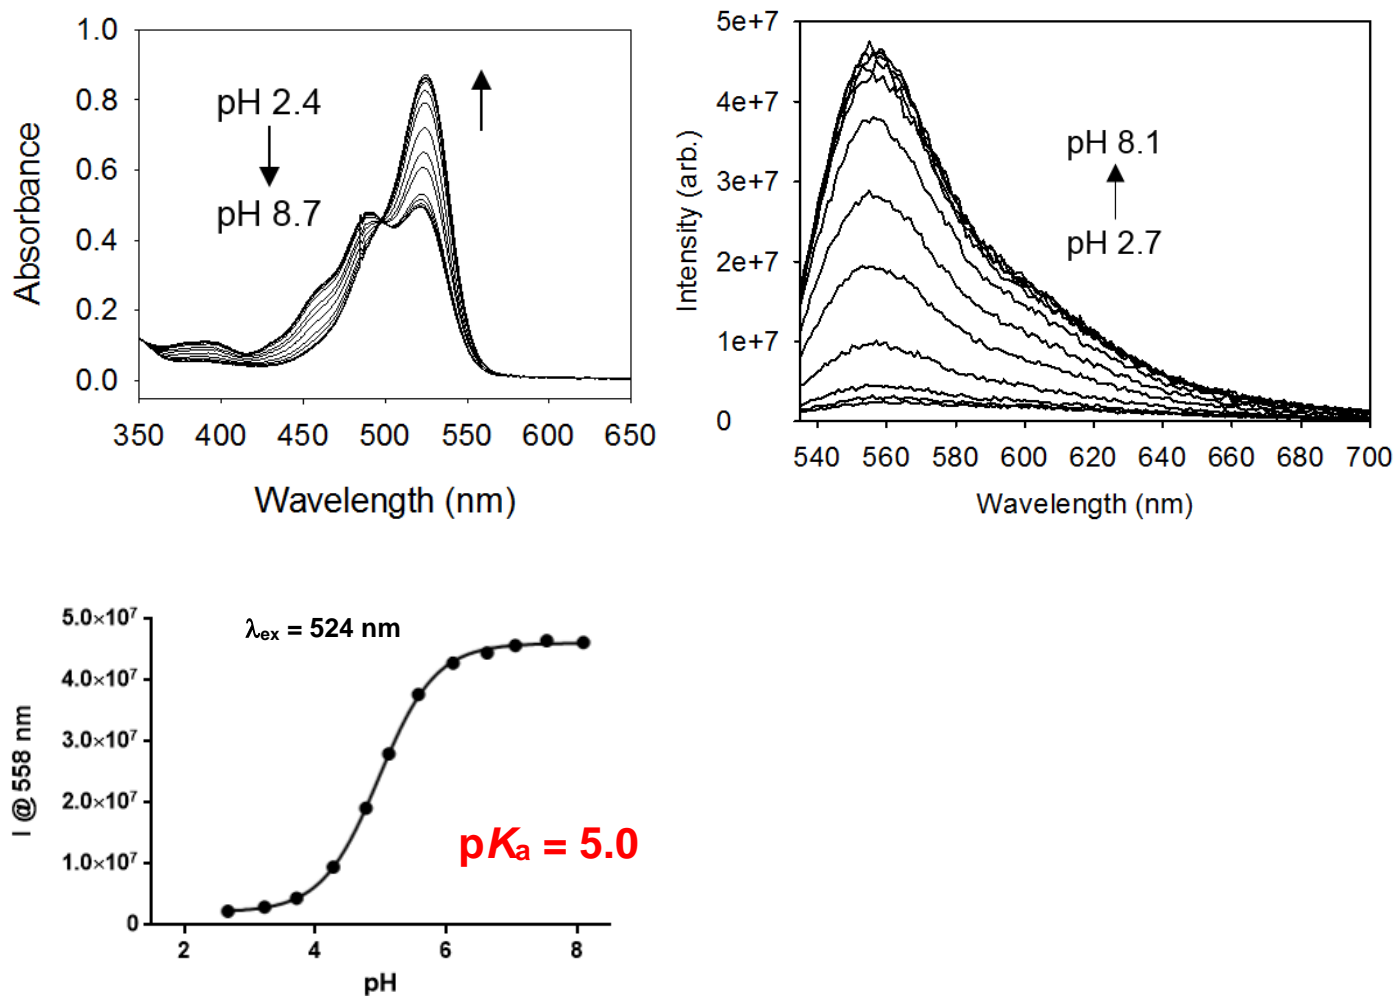

**Figure S5. pH Titration of Et-Rosol (20  $\mu\text{M}$ ) in buffer (50 mM phosphate, 150 mM NaCl, pH 7.4).** Various aliquot volumes of different NaOH solutions having a concentration of either 1, 4, or 8 M were added to the non-NIR fluorescent rosol dye to adjust the pH. A plot of the pH versus the intensity produces a sigmoidal curve where the inflection point represents the  $pK_a$ . The non-NIR fluorescent rosol dye was excited at its maximum absorbance wavelength ( $\lambda_{\text{abs}} = 524 \text{ nm}$ ).

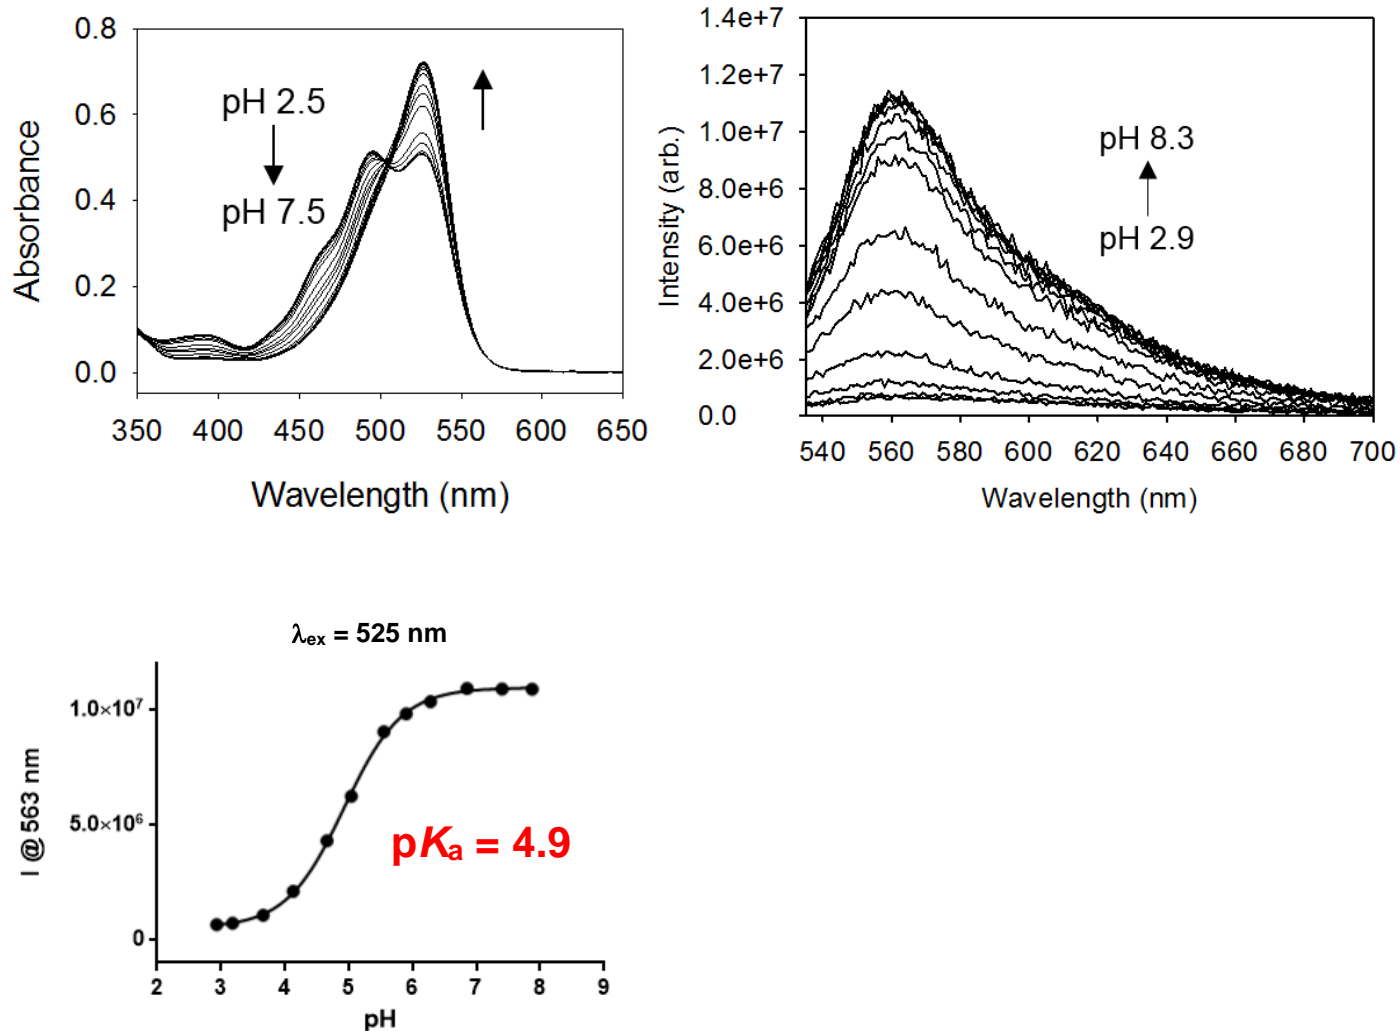

**Figure S6. pH Titration of Pip-Rosol (20  $\mu$ M) in buffer (50 mM phosphate, 150 mM NaCl, pH 7.4).** Various aliquot volumes of different NaOH solutions having a concentration of either 1, 4, or 8 M were added to the non-NIR fluorescent rosol dye to adjust the pH. A plot of the pH versus the intensity produces a sigmoidal curve where the inflection point represents the  $pK_a$ . The non-NIR fluorescent rosol dye was excited at its maximum absorbance wavelength ( $\lambda_{abs} = 525$  nm).

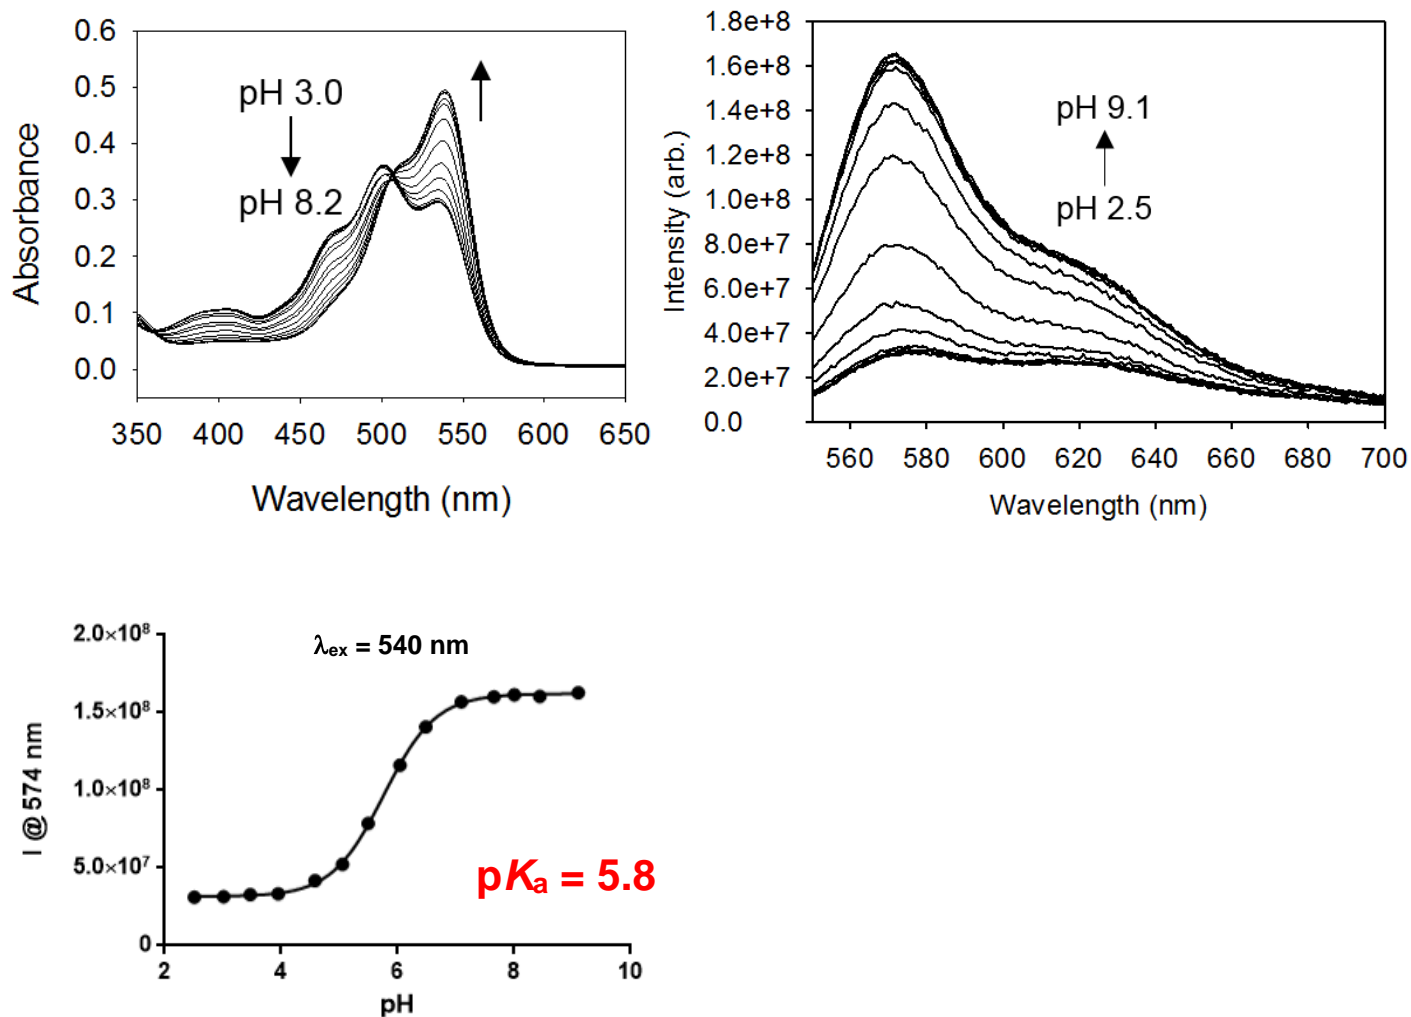

**Figure S7. pH Titration of Jul-Rosol (20  $\mu$ M) in buffer (50 mM phosphate, 150 mM NaCl, pH 7.4).** Various aliquot volumes of different NaOH solutions having a concentration of either 1, 4, or 8 M were added to the non-NIR fluorescent rosol dye to adjust the pH. A plot of the pH versus the intensity produces a sigmoidal curve where the inflection point represents the pK<sub>a</sub>. The non-NIR fluorescent rosol dye was excited at its maximum absorbance wavelength ( $\lambda_{\text{abs}} = 540$  nm).

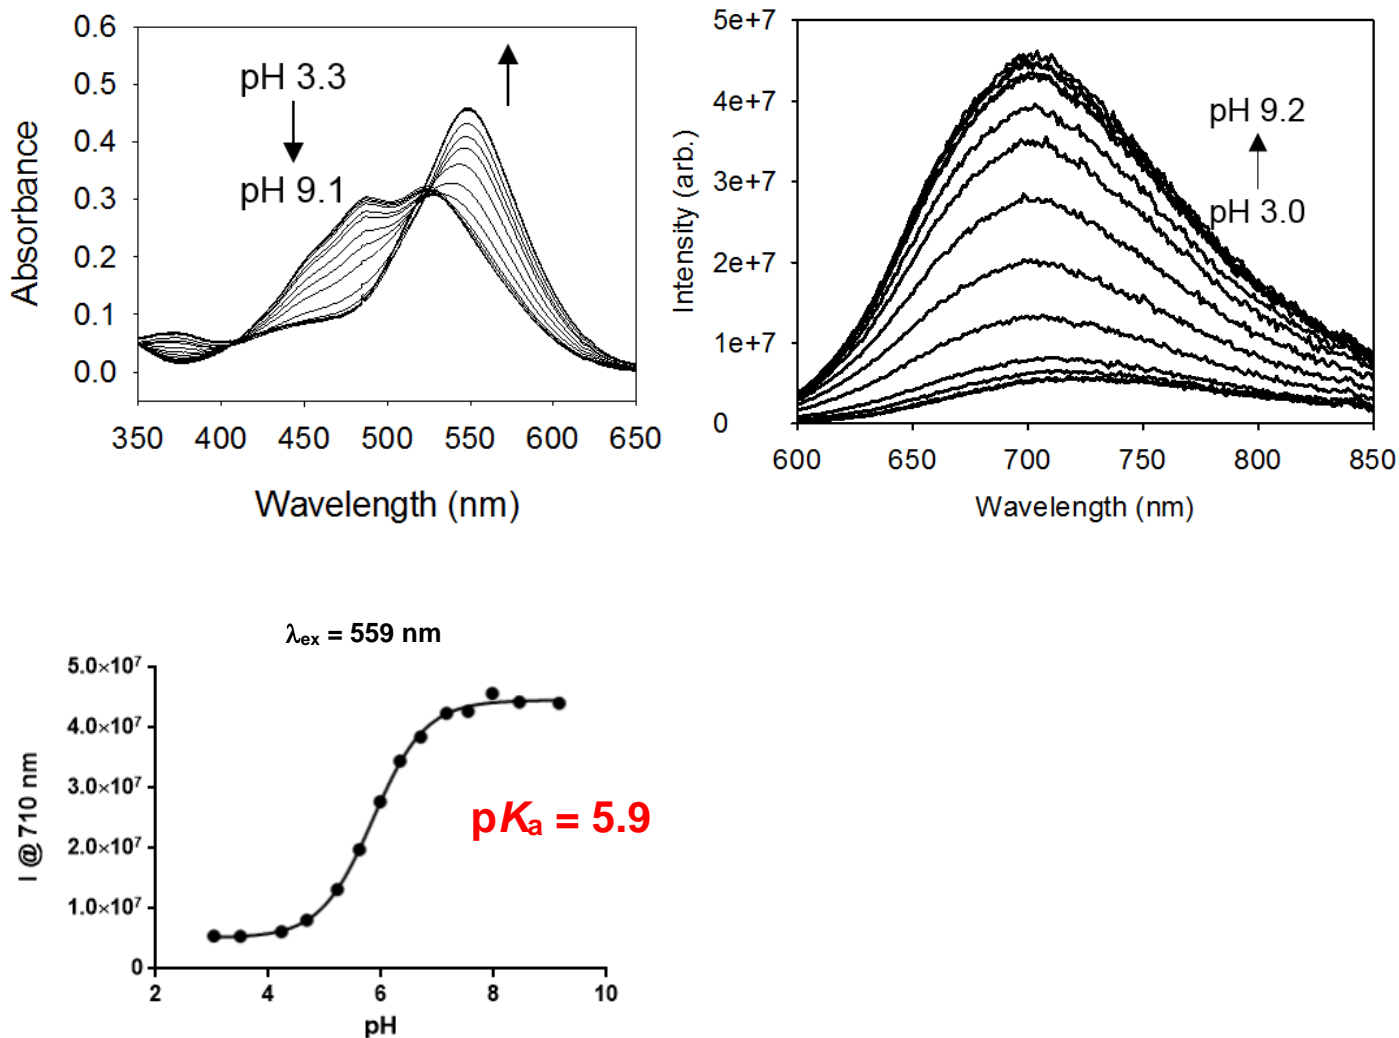

**Figure S8. pH Titration of THQ-Rosol (20  $\mu\text{M}$ ) in buffer (50 mM phosphate, 150 mM NaCl, pH 7.4).** Various aliquot volumes of different NaOH solutions having a concentration of either 1, 4, or 8 M were added to the NIR fluorescent rosol dye to adjust the pH. A plot of the pH versus the intensity produces a sigmoidal curve where the inflection point represents the pK<sub>a</sub>. The NIR fluorescent rosol dye was excited at its maximum absorbance wavelength ( $\lambda_{\text{abs}} = 559 \text{ nm}$ ).

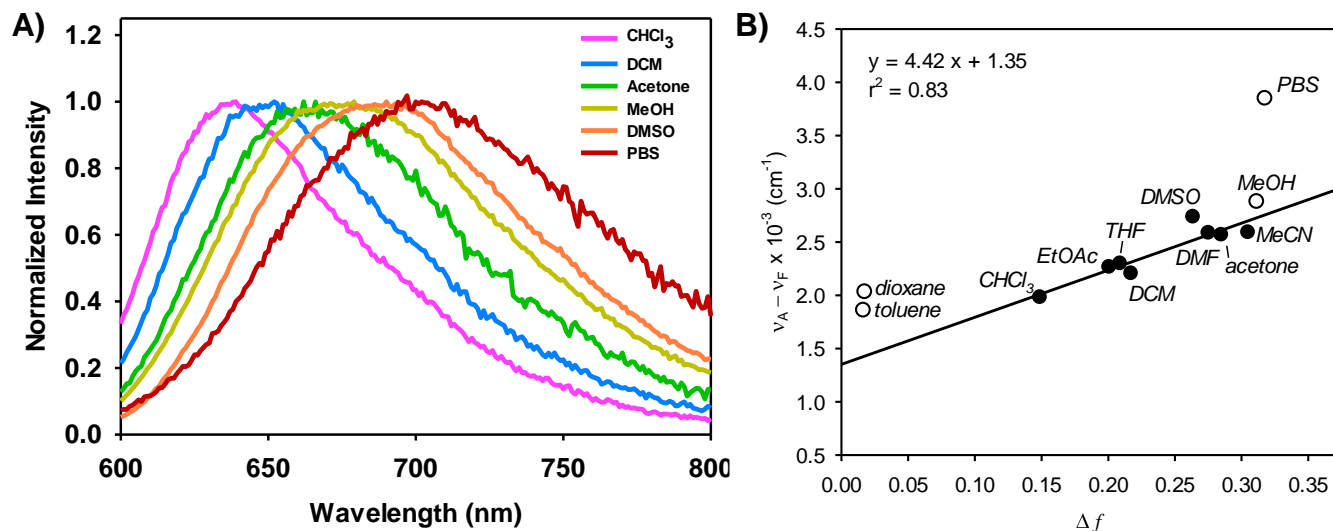

**Figure S9. Solvatochromatic Shifts.** Solvatochromatic shifts of **THQ-Rosol** (20  $\mu\text{M}$ ). A) Normalized fluorescence emission spectra in select solvents. B) Lippert-Mataga correlation plot. A filled dot ( $\bullet$ ) represents a solvent utilized in constructing a best linear fit to the data, whereas an open dot ( $\circ$ ) represents a solvent excluded for doing so due to second-order effects (i.e., specific chemical interactions) that are not described by the Lippert-Mataga theory, which include H-bonding (MeOH and PBS),  $\pi$ -stacking (toluene), and/or conformational changes (1,4-dioxane).  $\nu_A - \nu_F$  is the Stokes shift of **THQ-Rosol** in each solvent and  $\Delta f$  is the orientation polarizability of each solvent, which accounts for both the dielectric constant and refractive index of the solvent. A positive slope alongside a high correlation between the evaluated parameters ( $r^2 \geq 0.64$ ) reveals that the different Stokes shift of **THQ-Rosol** when in a polar aprotic solvent can be attributed to *general solvent effects*, and thus directly proportional to the change in its dipole moment, as described by the Lippert-Mataga theory.<sup>2-6</sup>

**Table S3.** Absorbance and emission maxima of **THQ-Rosol** (20  $\mu\text{M}$ ) evaluated in various solvents.

| Solvent                     | PBS | MeOH | Acetone | Ethyl acetate | DCM | $\text{CHCl}_3$ | DMF | DMSO | Toluene | 1,4-Dioxane | THF | MeCN |
|-----------------------------|-----|------|---------|---------------|-----|-----------------|-----|------|---------|-------------|-----|------|
| $\lambda_{\text{abs}}$ (nm) | 559 | 568  | 568     | 562           | 567 | 568             | 574 | 579  | 562     | 562         | 564 | 568  |
| $\lambda_{\text{em}}$ (nm)  | 710 | 678  | 665     | 644           | 648 | 640             | 674 | 688  | 628     | 638         | 648 | 666  |

Abbreviations: MeOH = methanol, DCM = dichloromethane,  $\text{CHCl}_3$  = chloroform, DMF = N,N-dimethylformamide, DMSO = dimethyl sulfoxide, THF = tetrahydrofuran, MeCN = acetonitrile,  $\lambda_{\text{abs}}$  = maximum absorbance wavelength.  $\lambda_{\text{em}}$  = maximum emission wavelength.



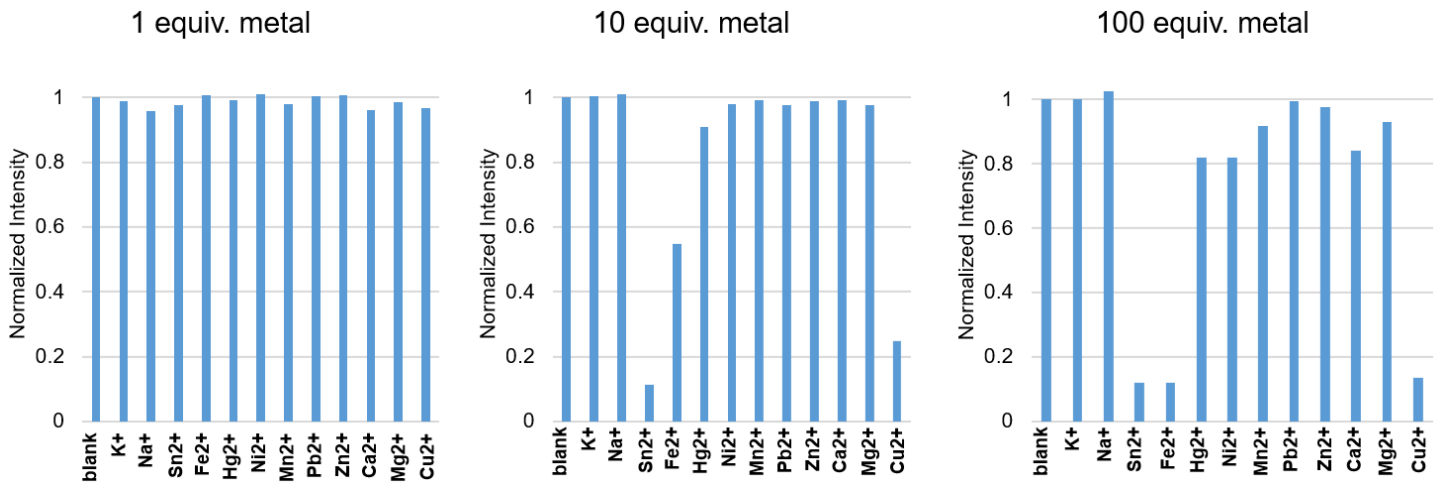

**Figure S10. Bioanalyte Titrations.** Titration of THQ-Rosol (20  $\mu\text{M}$ ) with various concentrations of various bioanalytes. The metal salts used for titrations include:  $\text{CuCl}_2$ ,  $\text{MgCl}_2$ ,  $\text{MnCl}_2$ ,  $\text{NaOAc}$ ,  $\text{KOAc}$ ,  $\text{SnCl}_2$ ,  $\text{Zn}(\text{OAc})_2$ ,  $\text{Hg}(\text{OAc})_2$ ,  $\text{Pb}(\text{OAc})_2$ ,  $\text{NiCl}_2$ ,  $\text{CaCl}_2$ , and  $\text{FeCl}_2$ .

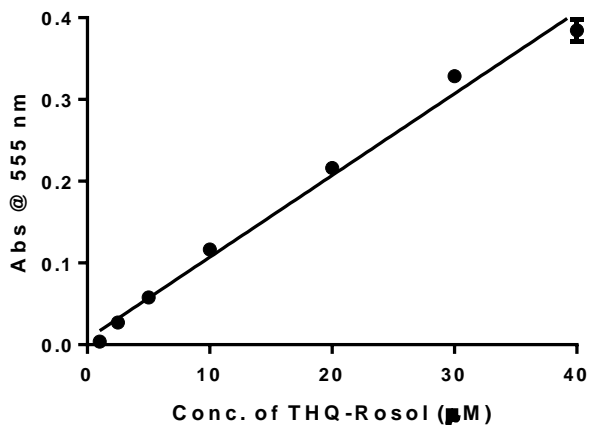

$$r^2 = 0.986$$

| Conc. ( $\mu\text{M}$ ) | Trial 1  | Trial 2  | Trial 3  |
|-------------------------|----------|----------|----------|
| 1.0                     | 0.001882 | 0.001291 | 0.008195 |
| 2.5                     | 0.019889 | 0.026573 | 0.034930 |
| 5.0                     | 0.056087 | 0.059930 | 0.057211 |
| 10.0                    | 0.114321 | 0.116683 | 0.118048 |
| 20.0                    | 0.226612 | 0.214521 | 0.207740 |
| 30.0                    | 0.315120 | 0.330655 | 0.340119 |
| 40.0                    | 0.400101 | 0.356846 | 0.396193 |

**Figure S11. Absorption-Based Linearity Profile.** Linearity of THQ-Rosol absorbance at different concentrations in PBS buffer, pH 7.4.

## 5. Cellular Analyses

**Cell Culture.** GBM U251 cells were cultured in RPMI media and GBM U87 cells were cultured in DMEM, each supplemented with 10% fetal bovine serum, 100 U/mL penicillin, and 100 µg/mL streptomycin. We acknowledge Dr. Sanjiv Sam Gambhir for having gifted the GBM39 cells to us after obtaining them from Dr. Paul Mischel (Ludwig Institute for Cancer Research, University of California at San Diego). The GBM39 cells had been transfected with lentiviral vectors that express firefly luciferase to enable bioluminescence imaging. GBM39 cells were grown in a defined, serum-free media of a 1:1 mixture of Neurobasal-A Medium (1X)/DMEM/F12(1X) that also contained HEPES Buffer Solution (10 mM), MEM Sodium Pyruvate Solution (1 mM), MEM Non-Essential Amino Acids Solution (10 mM, 1X), GlutaMAX-IT<sup>TM</sup> Supplement (1X) and Antibiotic–Antimycotic (1X). All solutions were purchased from Invitrogen<sup>TM</sup>/Life Technologies Inc. The full working media also contained h-EGF (20 ng/mL), h-FGF-basic-154 (20 ng/mL), h-PDGF-AA (10 ng/mL), h-PDGF-BB (10 ng/mL) and heparin solution, 0.2 % (2 µg/mL) as growth factors (all from Shenandoah Inc.) and B-27 (Invitrogen<sup>TM</sup>/Life Technologies) as supplements. All cells were propagated at 37°C in a humidified atmosphere containing 5% CO<sub>2</sub>.

**Cell Viability Assay.** The toxicity of **THQ-Rosol** to cells was evaluated by using Invitrogen<sup>TM</sup> Calcein-AM to stain live cells (see Supp Info). GBM U251 cells were seeded in a 96-well plate at a density of 10,000 cells per well in DMEM with 10% fetal bovine serum (FBS) and 1% penicillin/streptomycin at 37°C and 5% CO<sub>2</sub>. The cells were incubated with **THQ-Rosol** at different concentrations (200 nM, 1 µM, 5 µM, 10 µM, and 25 µM) in several replicates ( $n = 5$ ) for 2 hours at 37°C. The cells were then incubated with Invitrogen<sup>TM</sup> Calcein-AM (5 µM) for 45 min at 37°C, and then imaged using a Tecan Safire plate reader with excitation and emission wavelengths of 494 nm and 516 nm, respectively.

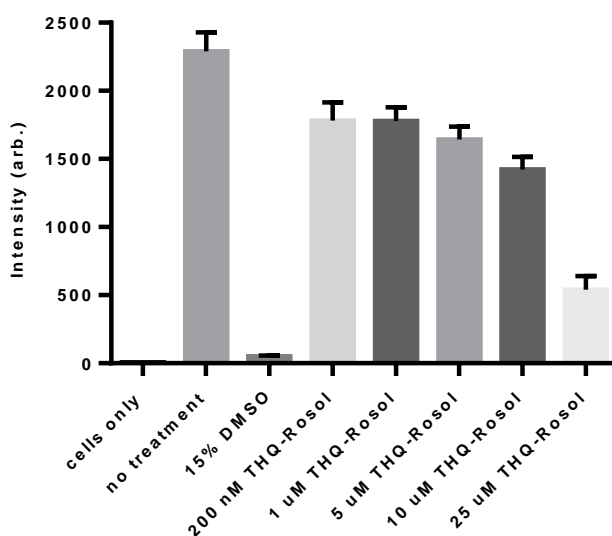

**Figure S12. Cell viability assay of THQ-Rosol with U251 GBM cells.** The cells were treated with various concentrations of **THQ-Rosol** and then incubated with Invitrogen<sup>TM</sup> Calcein-AM to determine the extent of live cells via measuring the fluorescence emission at 515 nm ( $\lambda_{\text{ex}} = 494$  nm).

**Confocal Microscopy.** The cell permeability and localization of **THQ-Rosol** were examined in GBM U87 cells using a Leica SP8 confocal fluorescence microscope. Cells were plated onto 35 mm, 4-chamber glass-bottom dishes (In Vitro Scientific, Inc.) at a density of 50,000 cells/well and allowed to adhere overnight at 37°C in a humidified atmosphere containing 5% CO<sub>2</sub>. For assessing the cell permeability of **THQ-Rosol** and its presence within cells, we incubated only **THQ-Rosol** (10 μM, 37°C, 30 min) in GBM U87 cells and then visualized **THQ-Rosol** in the cells ( $\lambda_{ex} = 550$  nm,  $\lambda_{em} = 680-900$  nm). To validate **THQ-Rosol** localized to lysosomes, GBM U87 cells were incubated with LysoTracker Green DND-26 (5 μM, 37°C, 30 min), washed with PBS (600 μL), provided DMEM (600 μL, without phenol red), incubated with **THQ-Rosol** (10 μM, 37°C, 30 min), and then imaged to prevent the loss of localized **THQ-Rosol**, wherein we used two different pairs of appropriate excitation and emission channels ( $\lambda_{ex1} = 550$  nm,  $\lambda_{em1} = 680-900$  nm for visualizing **THQ-Rosol** and  $\lambda_{ex2} = 504$  nm,  $\lambda_{em2} = 514-530$  nm for visualizing LysoTracker Green DND-26). A 100X (NA = 1.40 oil) objective lens was used. Pearson's coefficient was calculated using the Fiji (ImageJ) plugin Coloc 2.

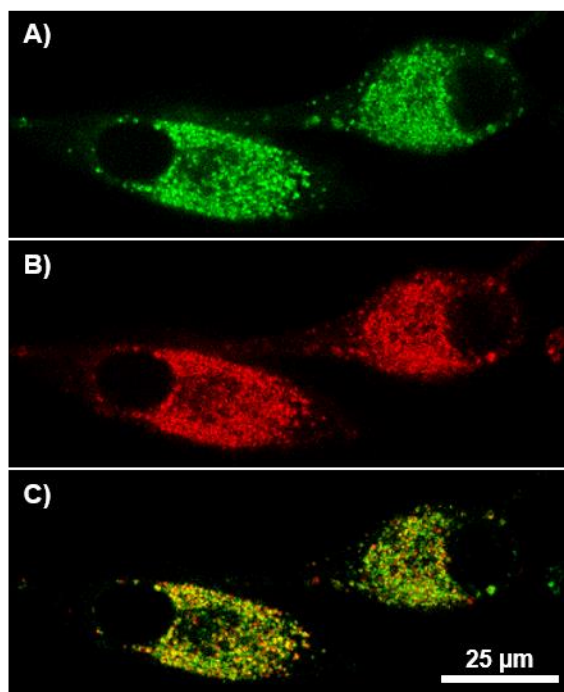

**Figure S13. Confocal fluorescence imaging.** GBM U87 cells incubated with LysoTracker Green DND-26 (5 μM), incubated with **THQ-Rosol** (10 μM), and visualized using a A) 514-530 nm ( $\lambda_{ex1}$ : 504 nm) band-pass filter for LysoTracker Green DND-26 and B) 680-900 nm ( $\lambda_{ex2}$ : 550 nm) band-pass filter for **THQ-Rosol**, respectively. C) Merged image. Scale bar = 25 μm.

## **6. In Vivo Studies**

**In Vivo Tumor Models.** All experimental procedures involving animals were approved by the Stanford University Institutional Animal Care and Use Committee (IACUC). For tumor models, GBM39 cells ( $0.5 \times 10^6$  cells; 150  $\mu$ L of serum-free media) were subcutaneously injected on the back of female nu/nu mice (age 17-18 weeks; Charles River Laboratories) and allowed to grow for 6 weeks. Tumor size was monitored by calipers and firefly luciferase bioluminescence imaging.

**Animal Imaging.** Animals were anesthetized with 2% isoflurane in oxygen and kept on a heating pad between imaging time points, wherein their body temperatures were kept constant at 37°C during imaging. Bioluminescence imaging was obtained via intraperitoneal injections into the mice using firefly D-luciferin (150  $\mu$ L, 15 mg/mL in PBS), waiting 10 min, and then imaging using exposure time of 300 ms in order to monitor initial tumor growth. Fluorescence imaging was obtained both before after administering either ICG or **THQ-Rosol** (50  $\mu$ L, 25  $\mu$ M in 0.9% w/v saline using a 1% w/v DMSO co-solvent) to the mice. The mice were imaged at several time points (0, 0.25, 0.5, 1, 2, 4, 6, 24 hrs) before and following the administration of either dye. Fluorescence images were taken on a Cambridge Research & Instrumentation, Inc. (CRi Inc.) Maestro™ spectral fluorescent imager using a 503-555 nm excitation filter and 580 nm long-pass emission filter for spectral cube images and 710 nm for mono-emission image capture. Spectral unmixing was used to isolate **THQ-Rosol** signal from background. For ICG, we utilized a 710-760 nm band-pass excitation filter and 800 nm long-pass emission filter. Using ImageJ (National Institutes of Health, USA), regions of interest of identical size and shape were manually drawn to separately circumscribe the tumor area and healthy tissue within each image, separately averaged, and presented as a normalized tumor-to-background ratio.

## 7. $^1\text{H}$ & $^{13}\text{C}$ NMR Spectroscopy

Compound Me-2 (acylated methoxy-intermediate)

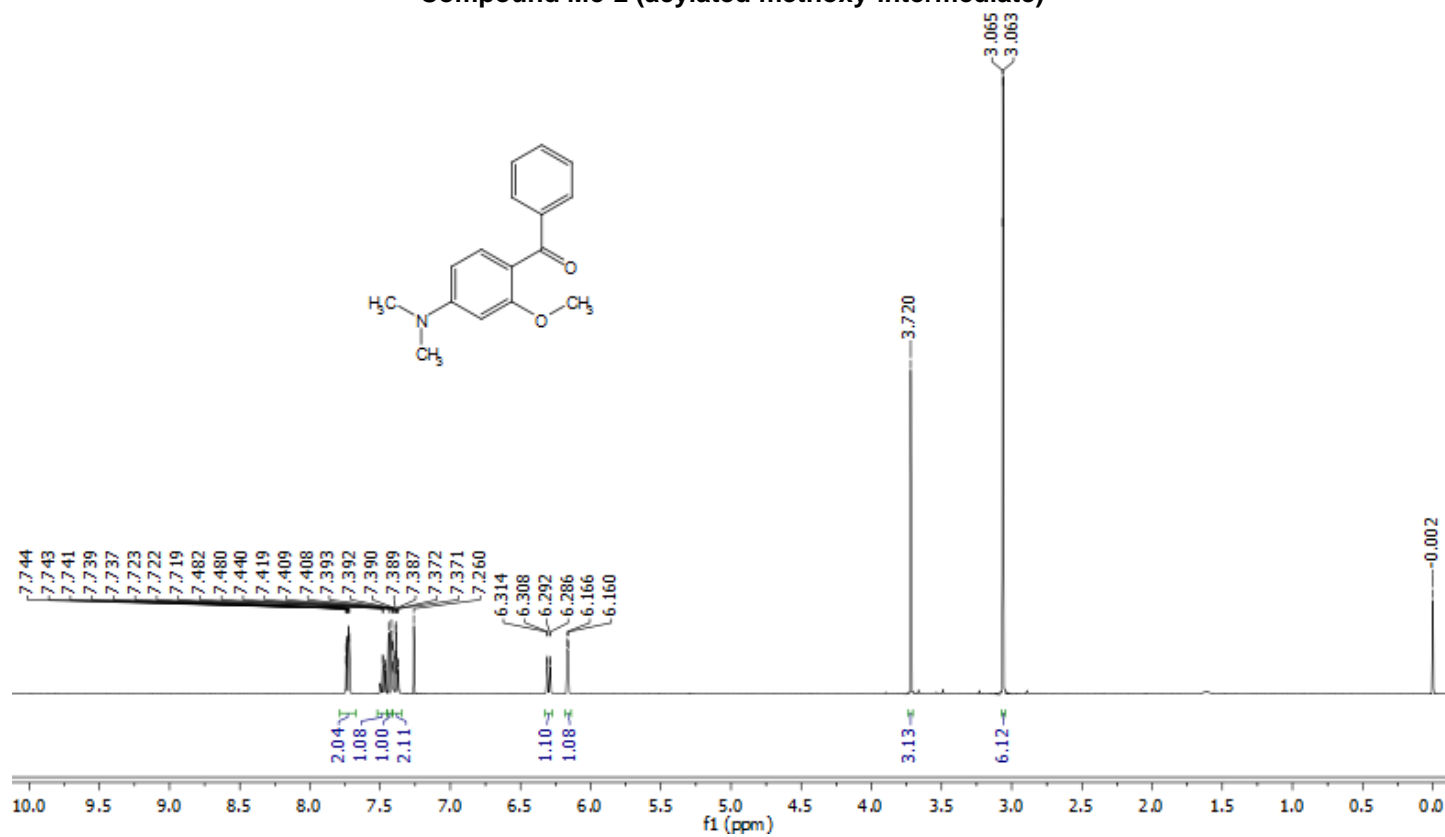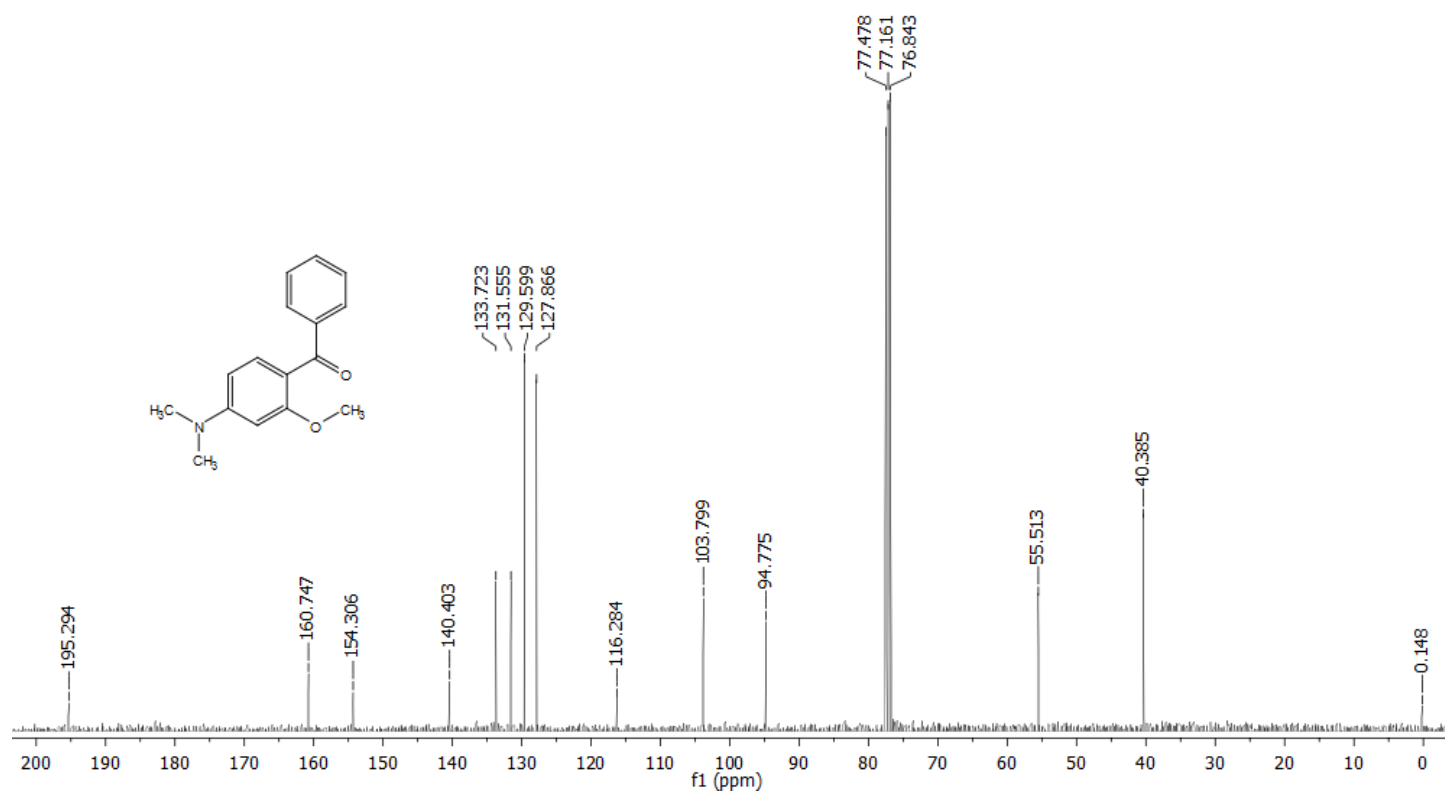

Compound Me-2

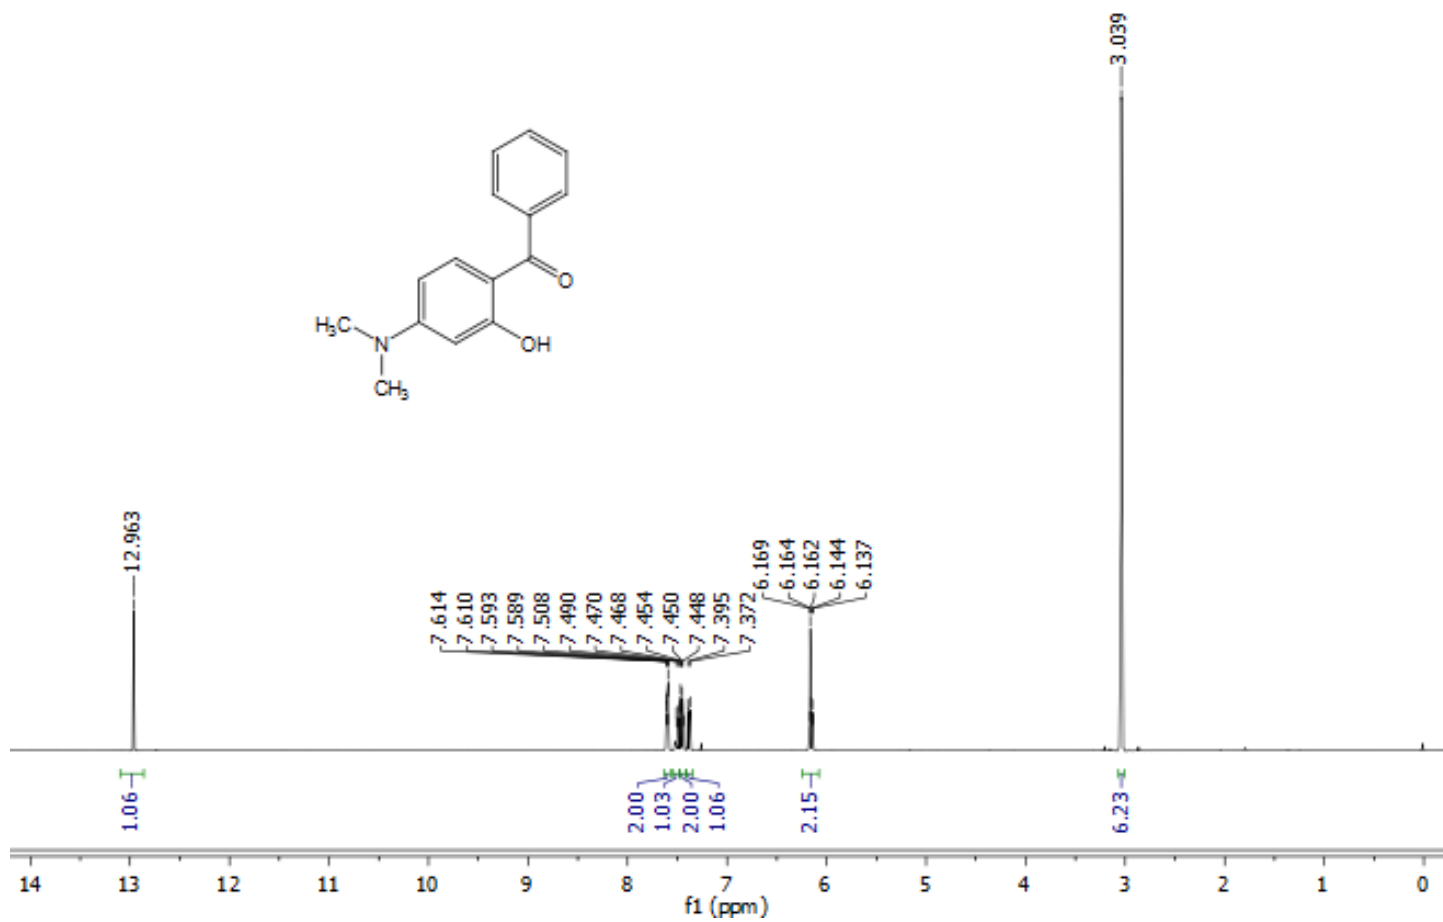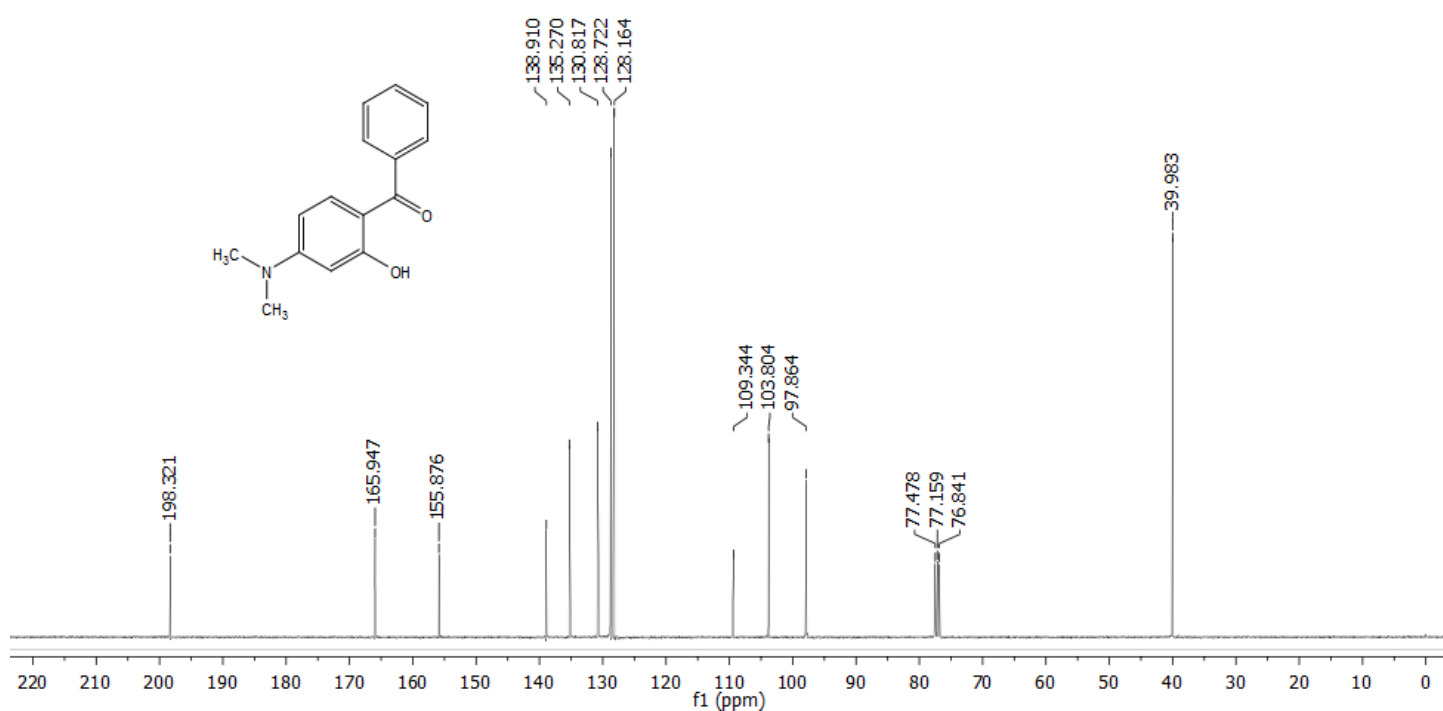

# Me-Rosol

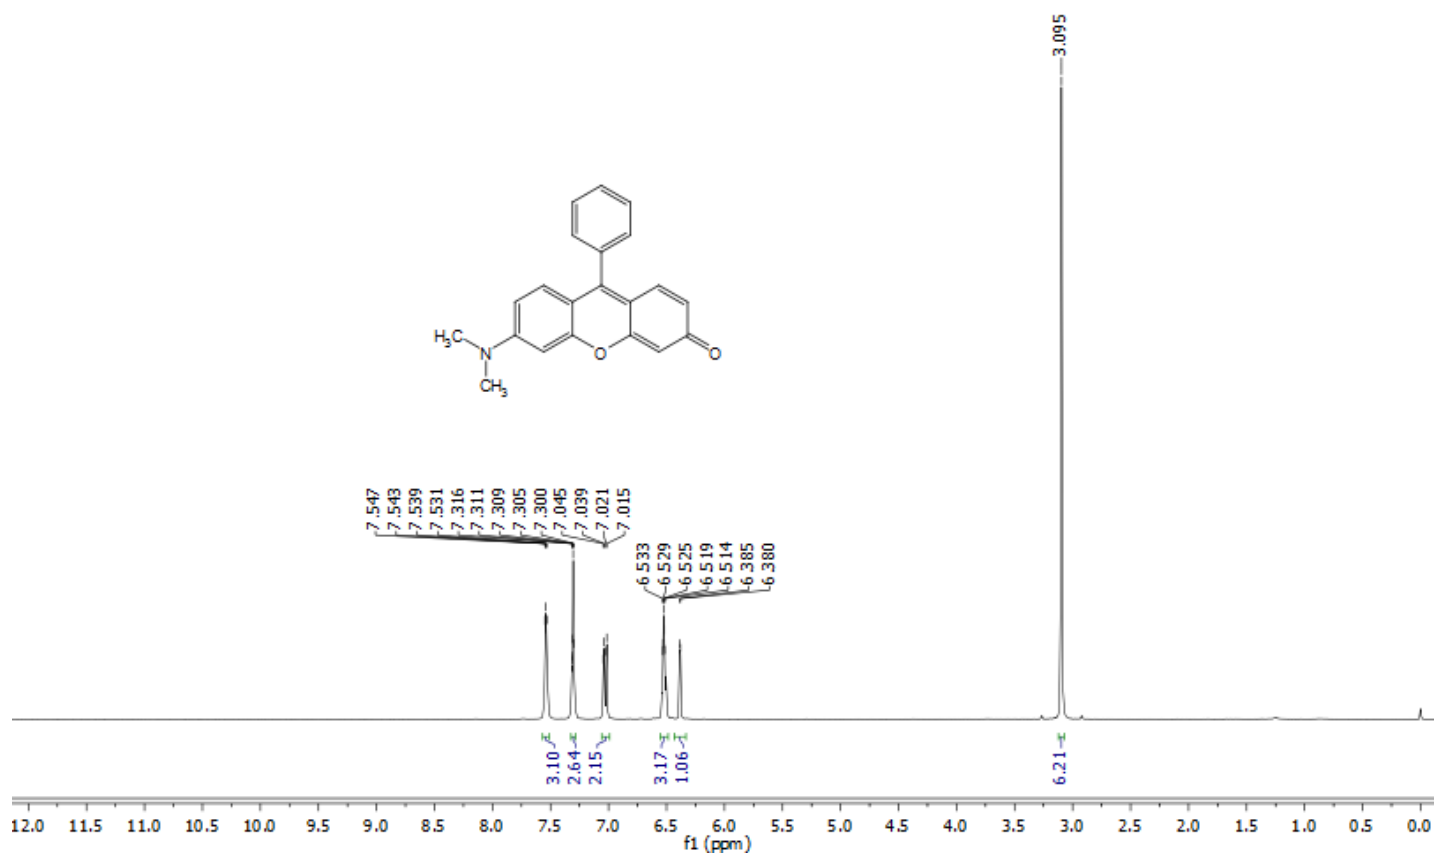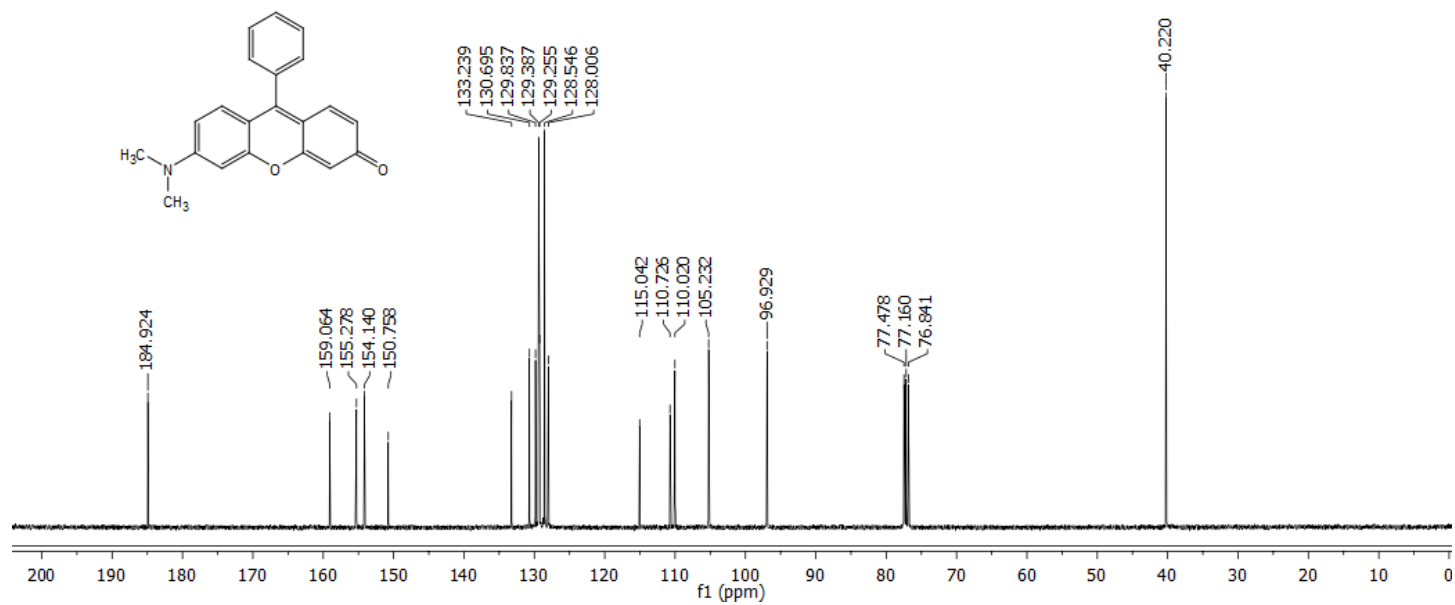

Compound Et-2 (acylated methoxy-intermediate)

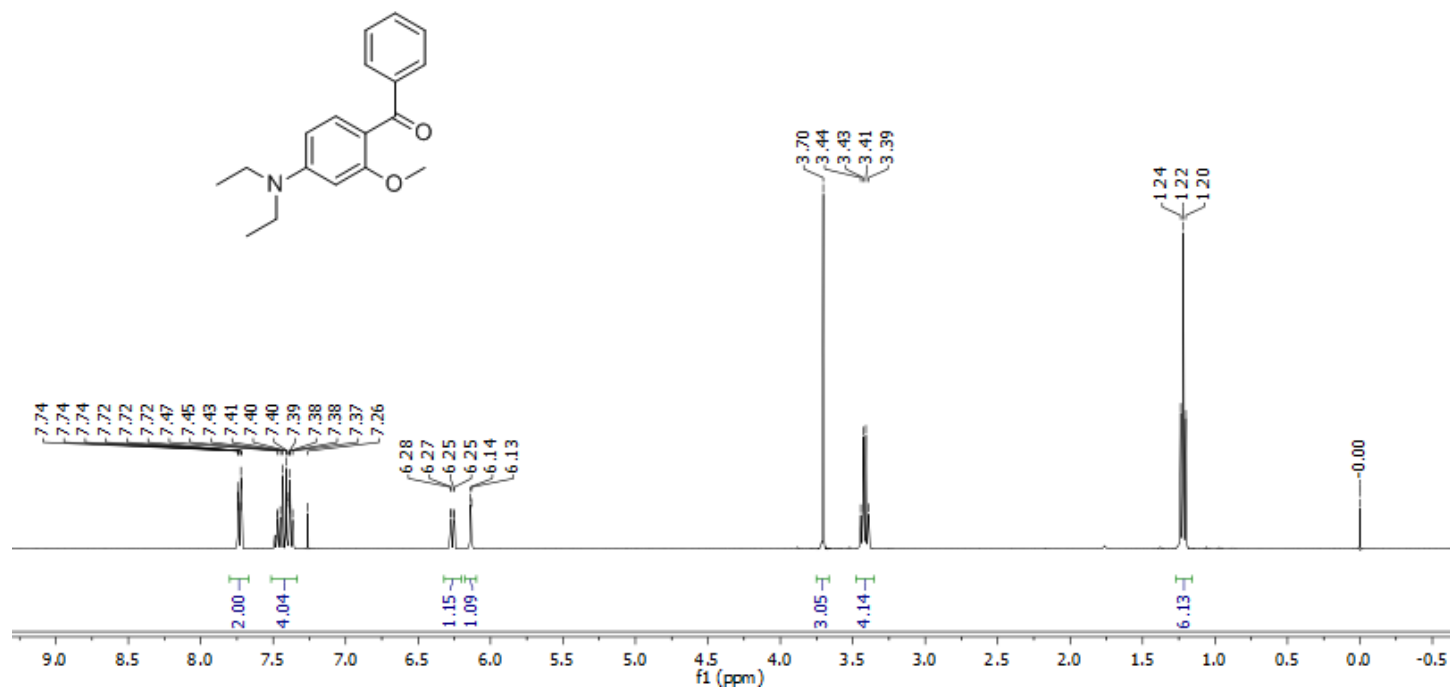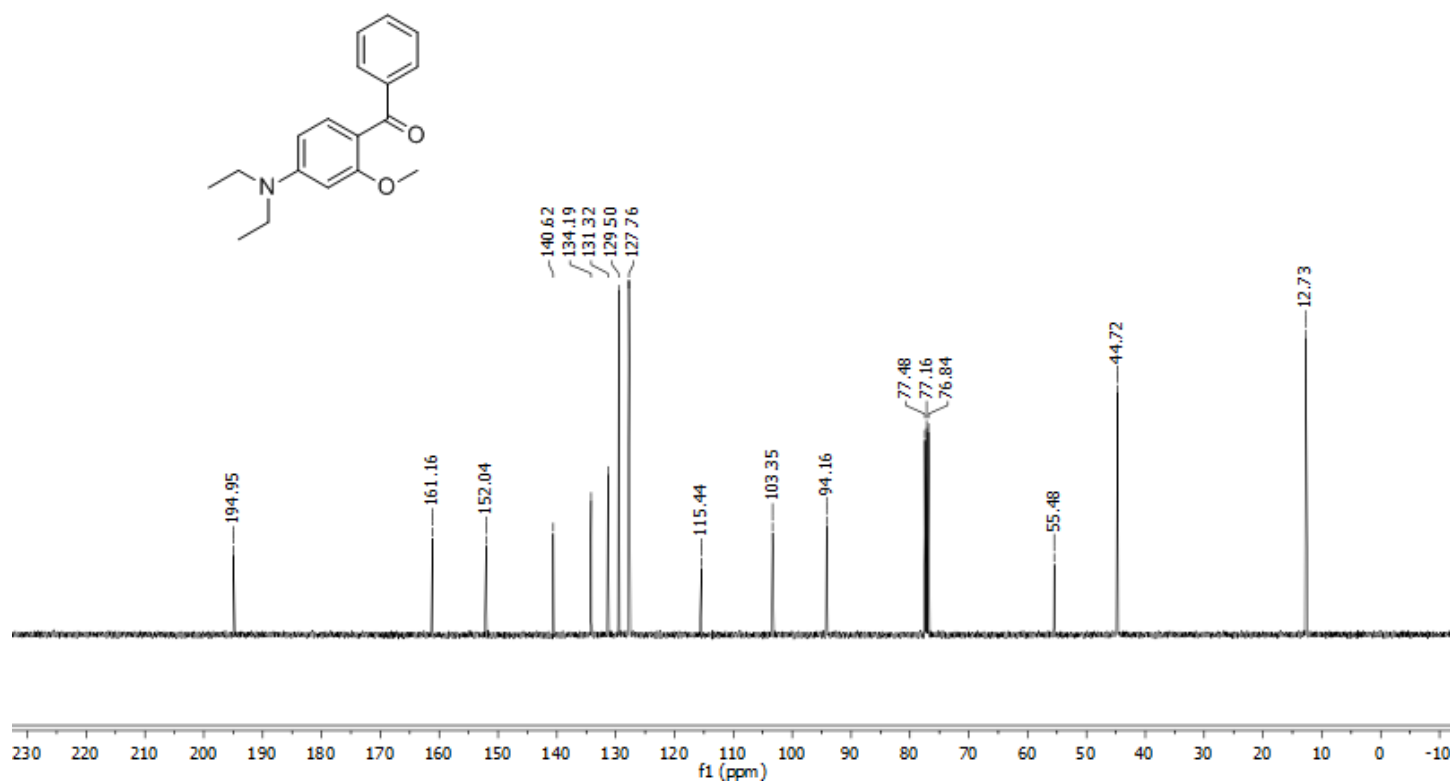



Compound Et-2

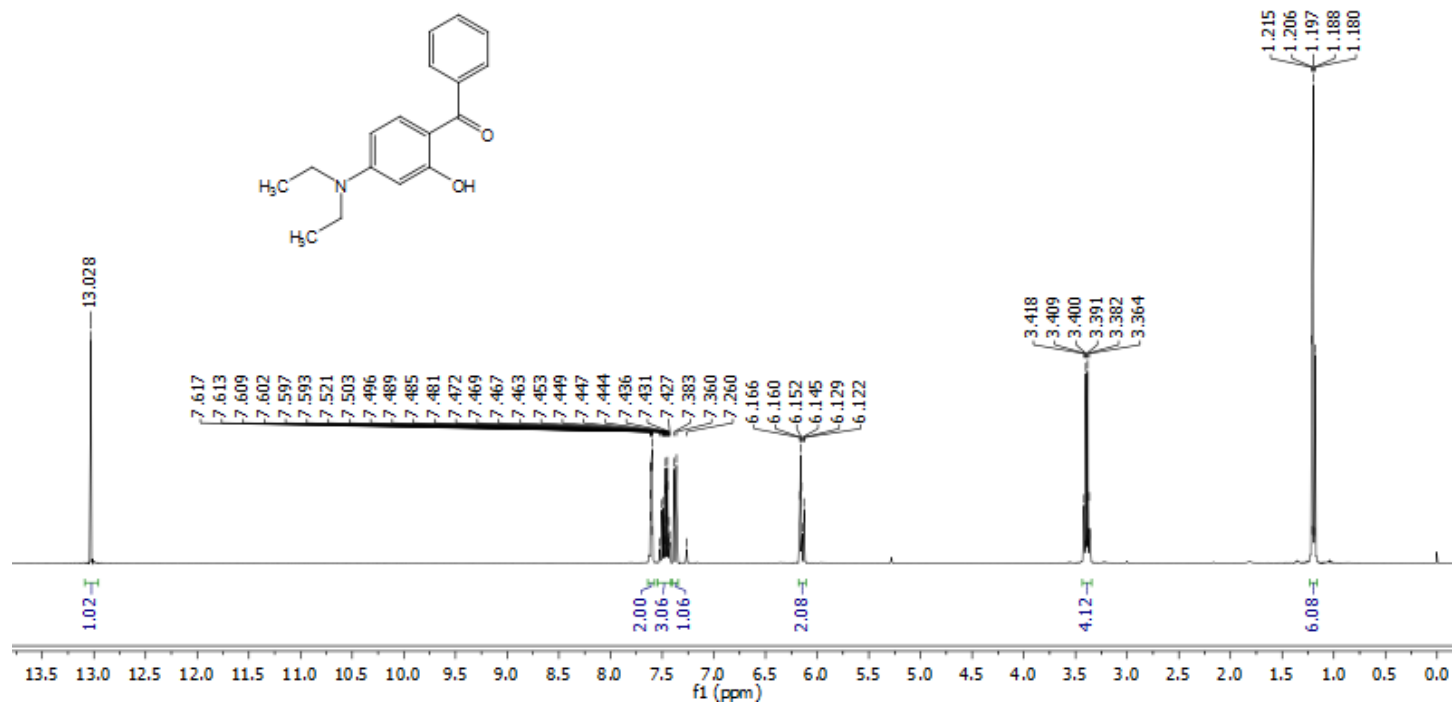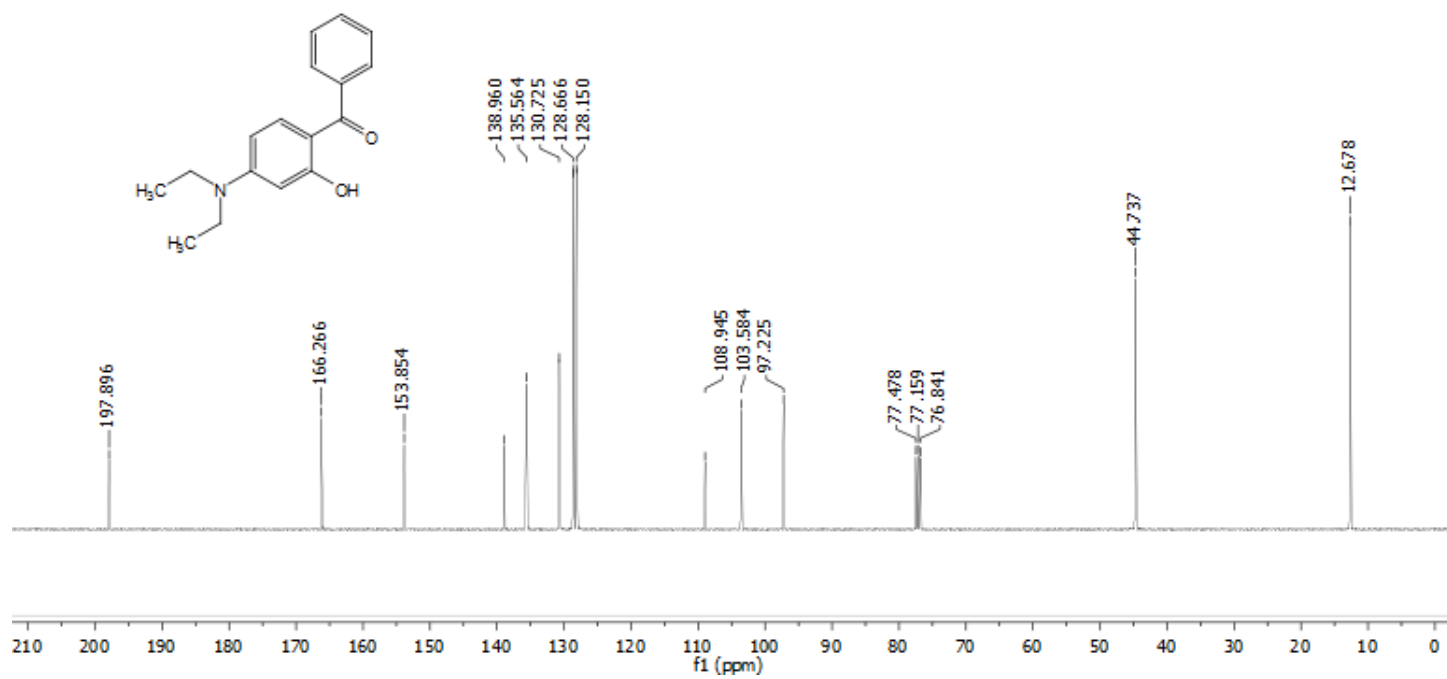

Et-Rosol

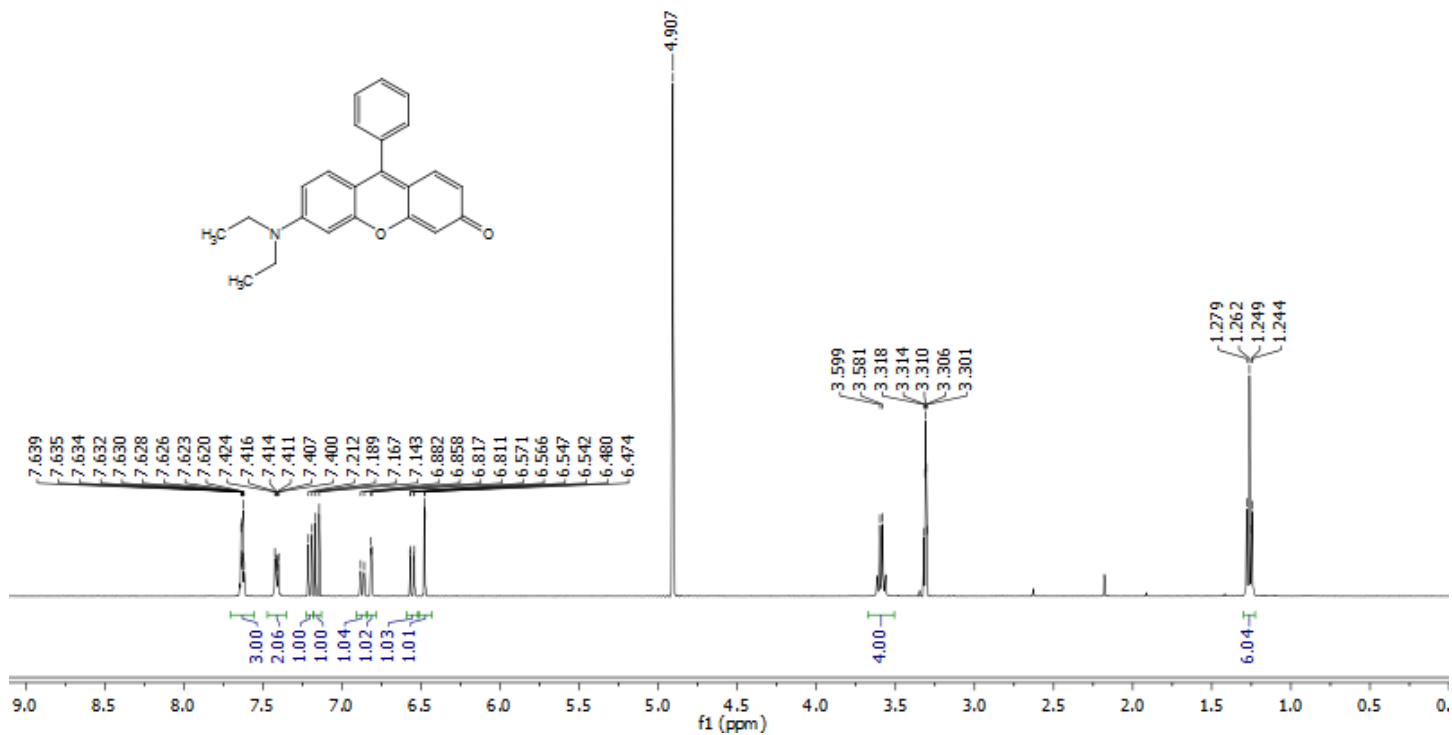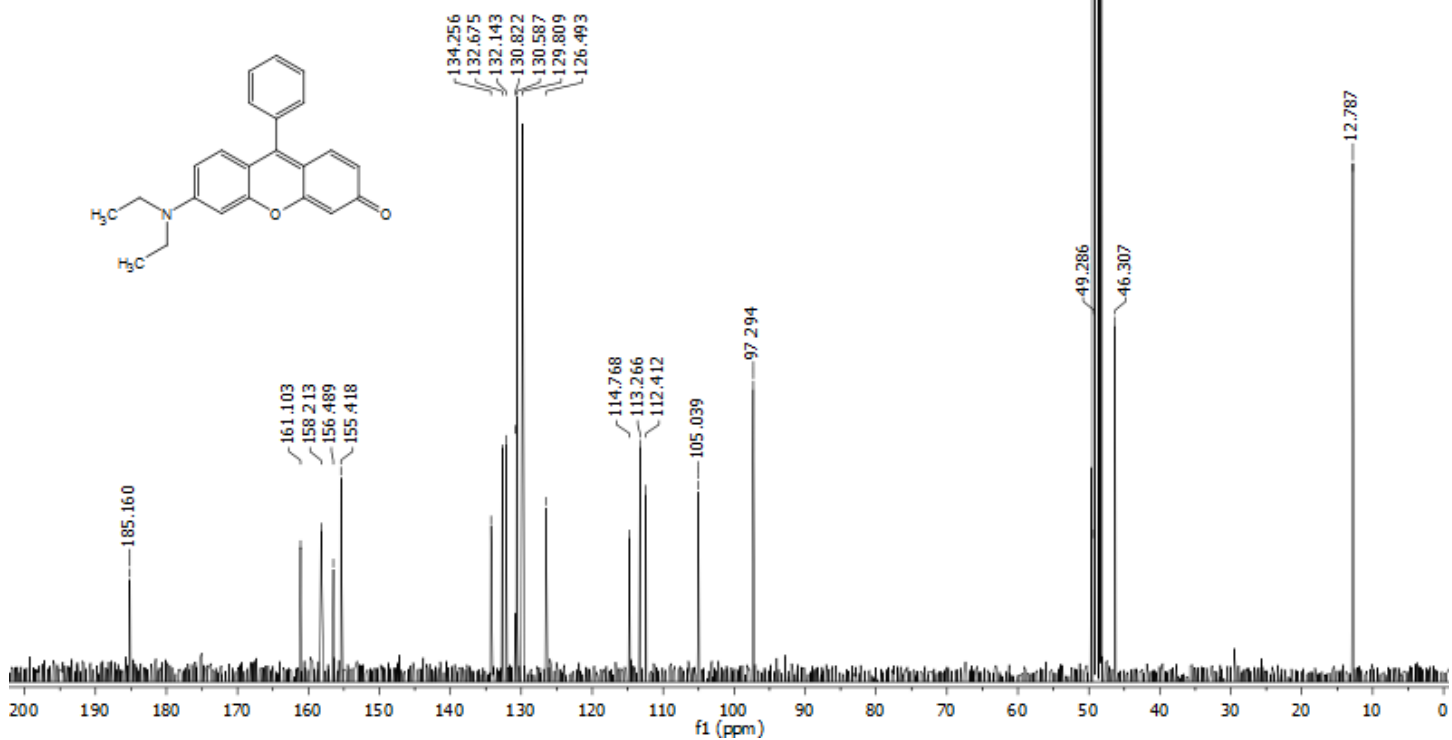

Compound Pip-2 (acylated methoxy-intermediate)

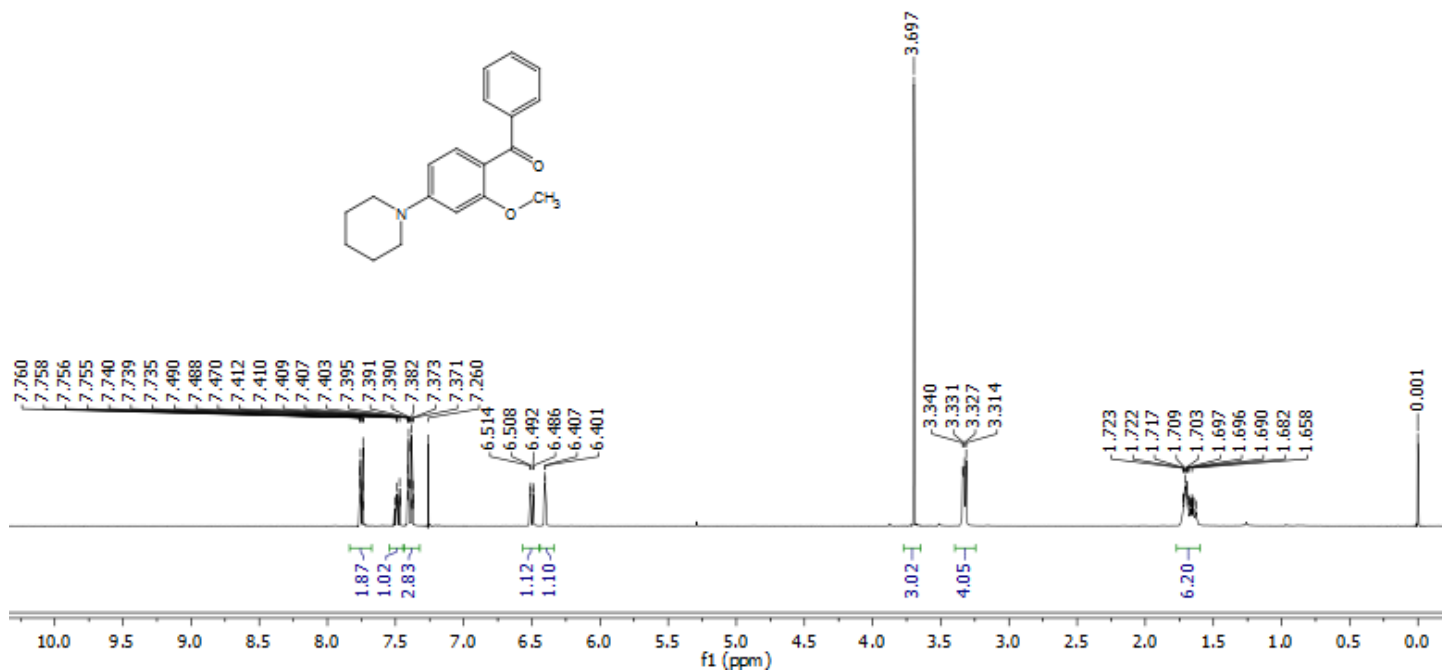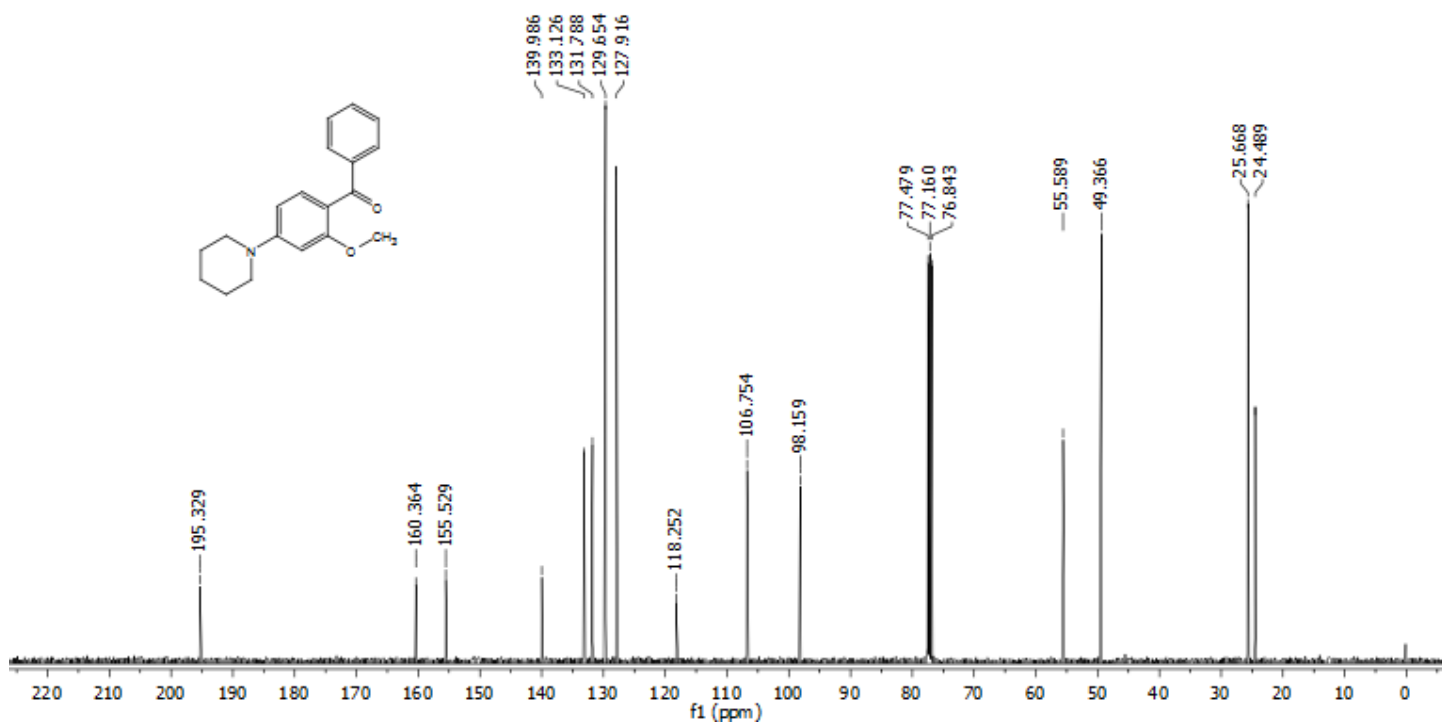

# Compound Pip-2

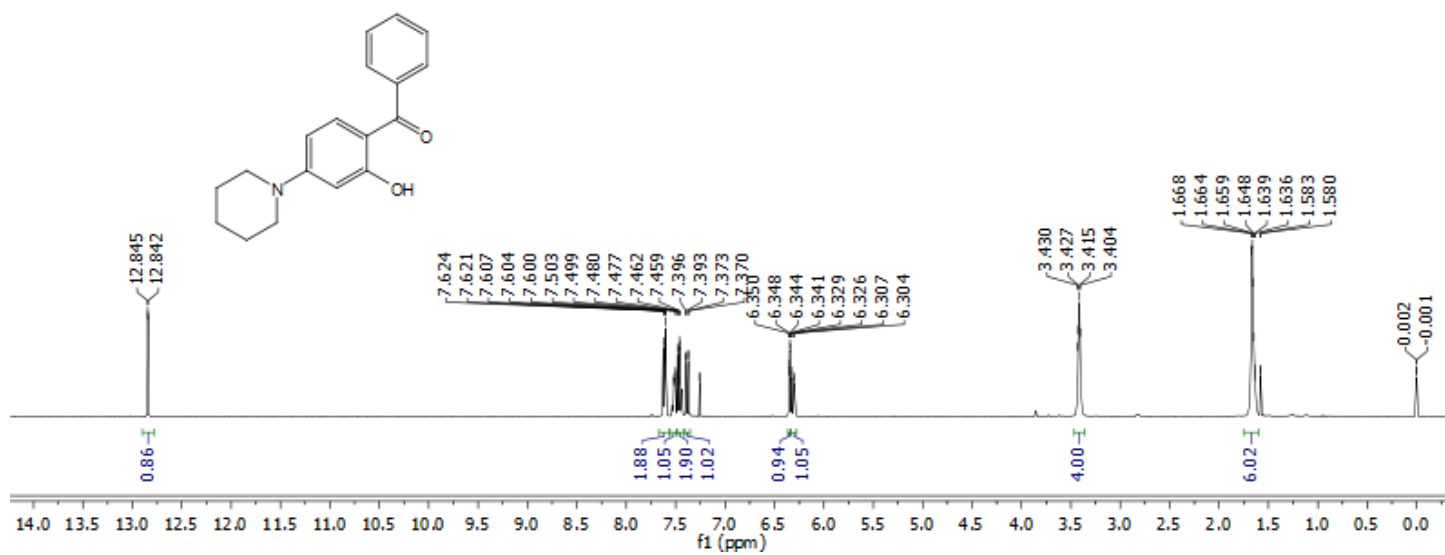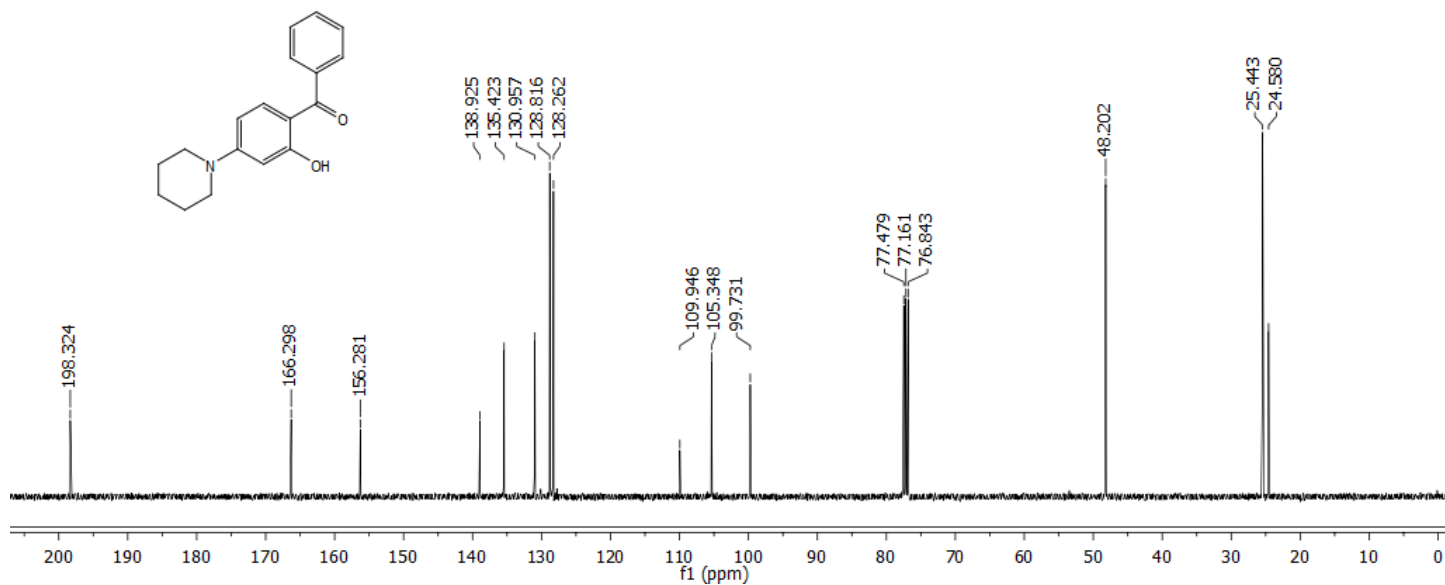

# Pip-Rosol

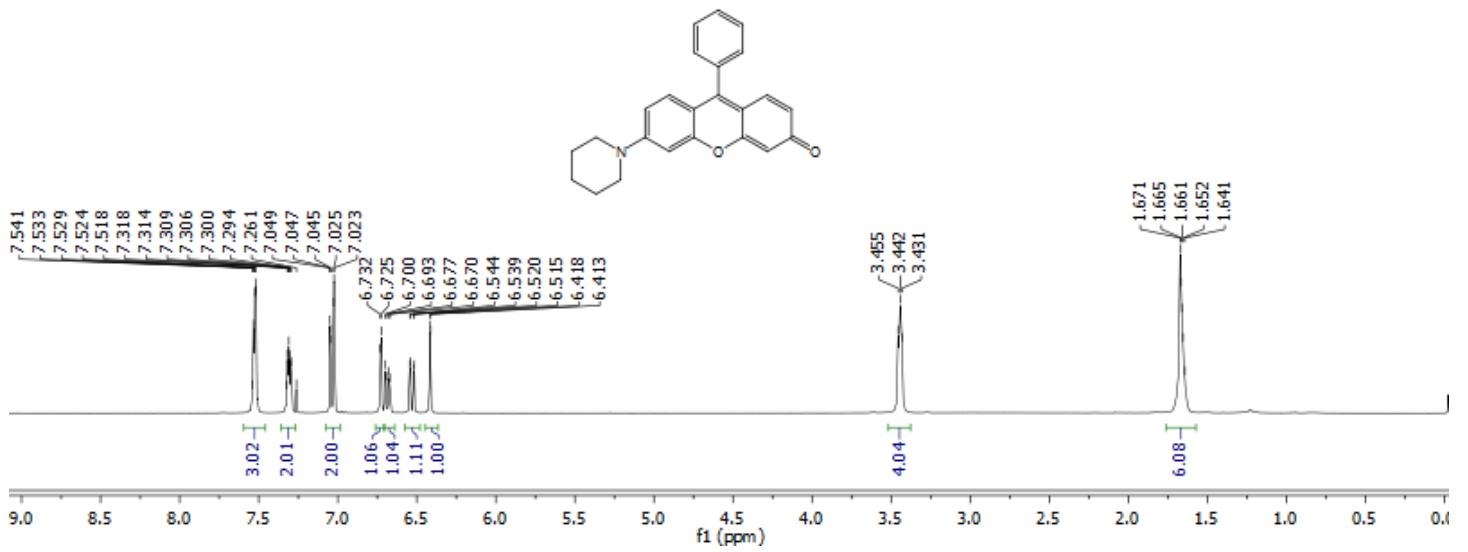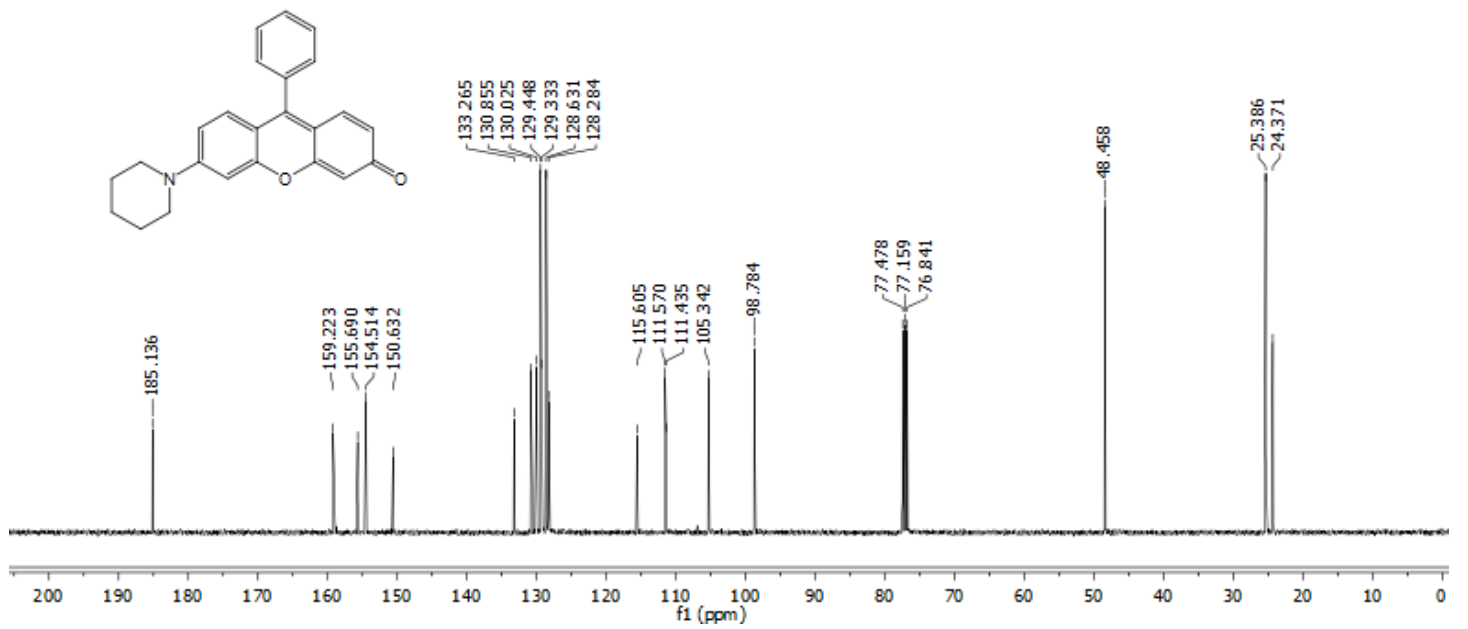

Compound Jul-2 (acylated methoxy-intermediate)

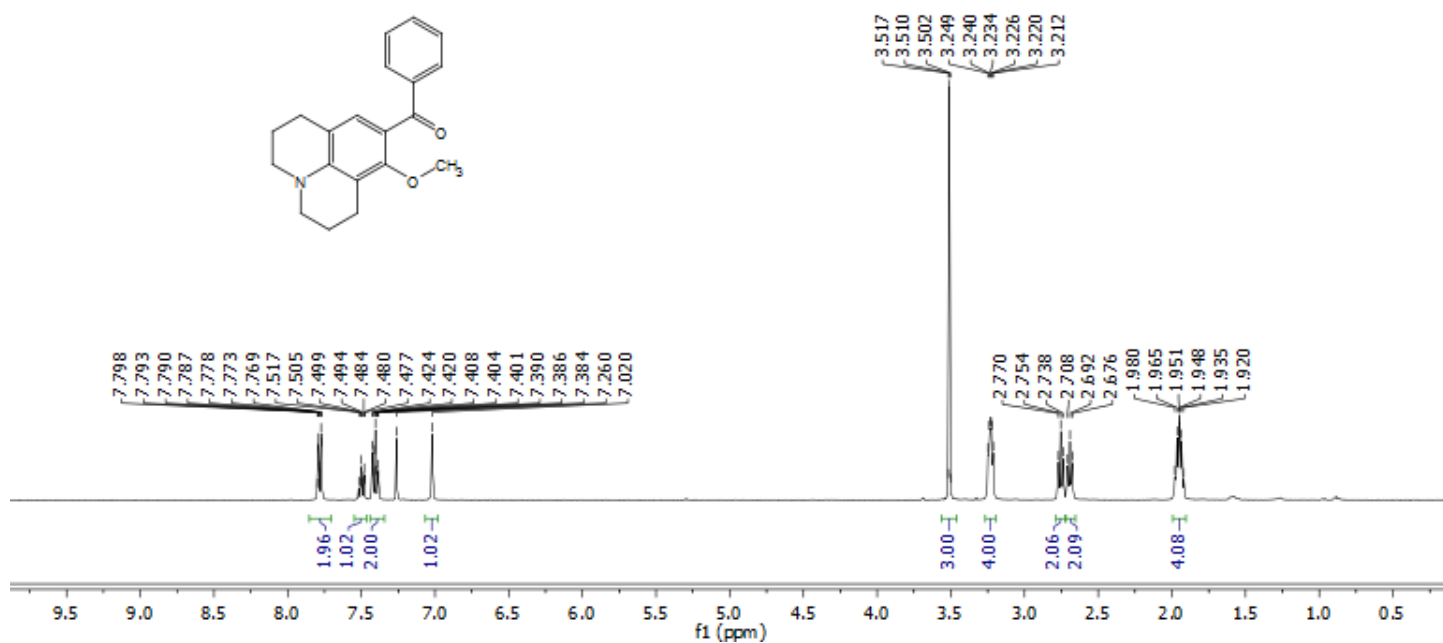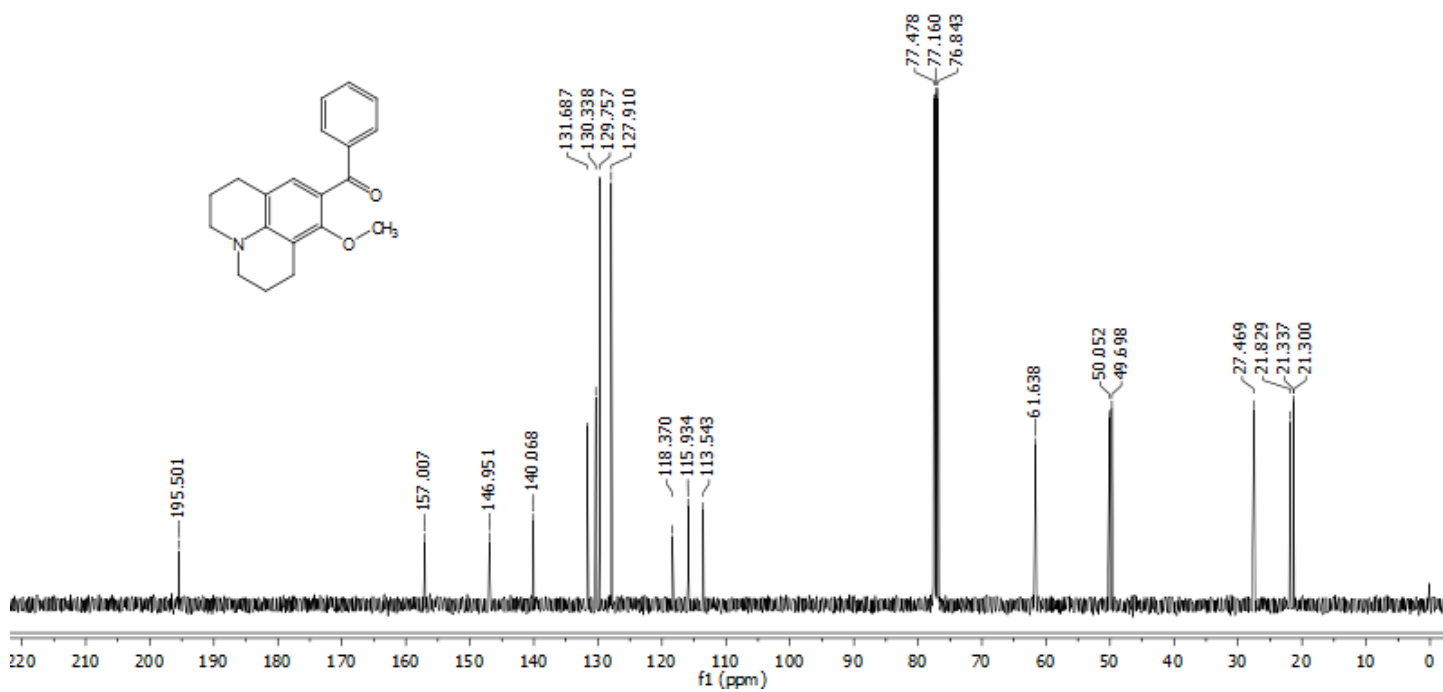

Compound Jul-2

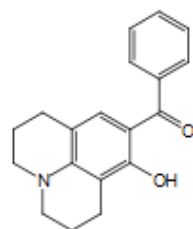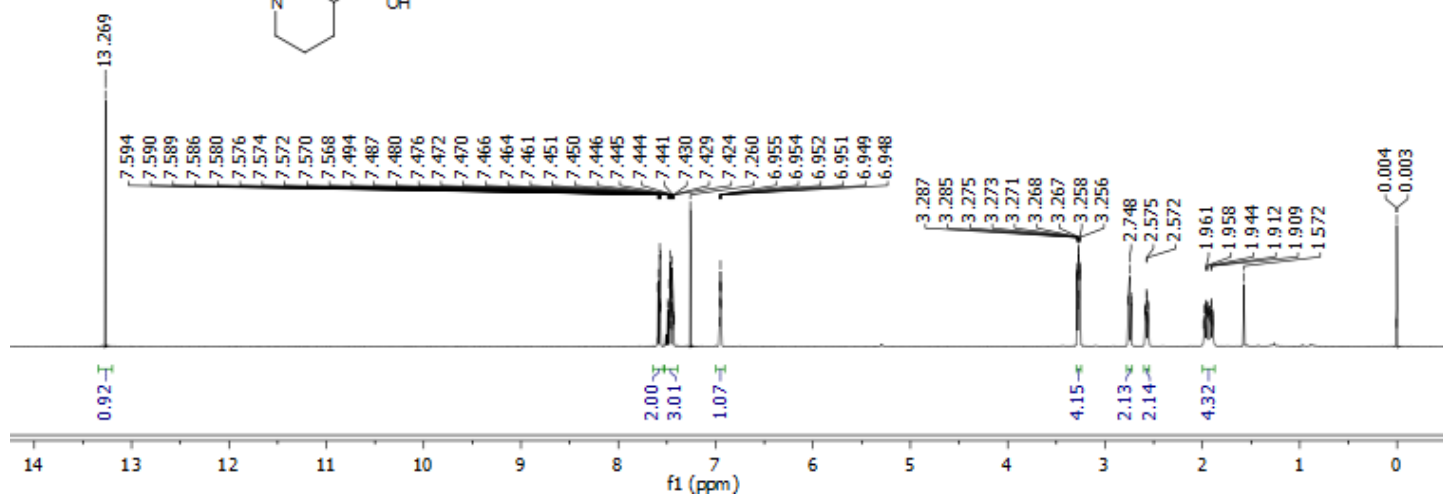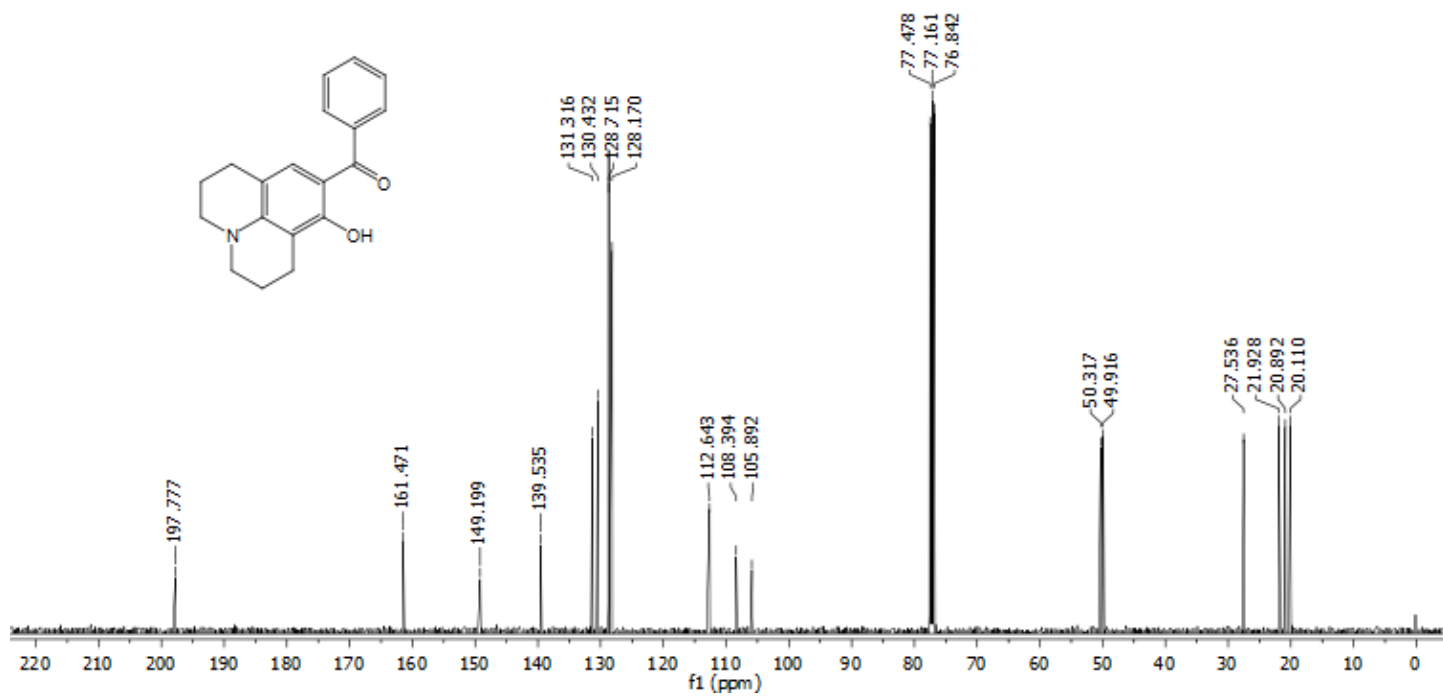

Jul-Rosol

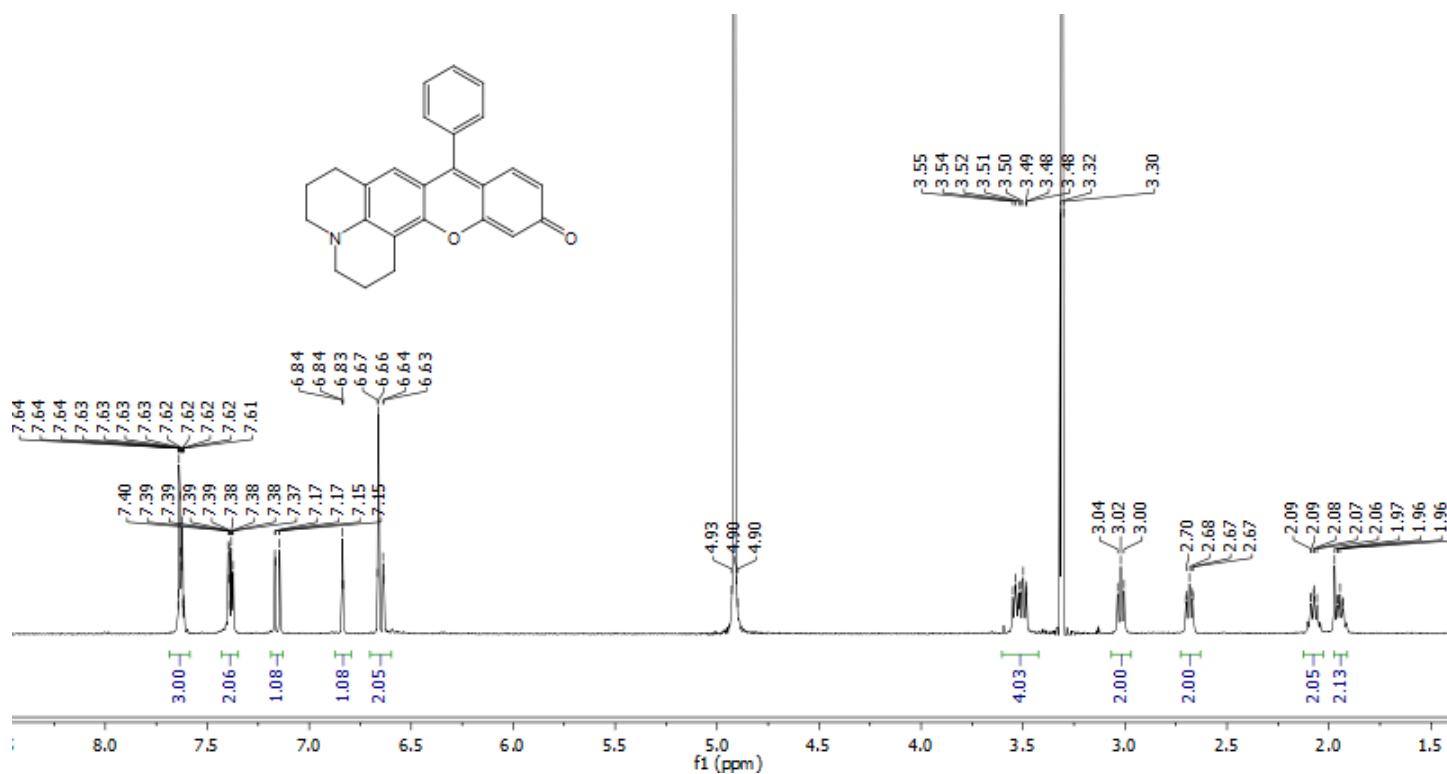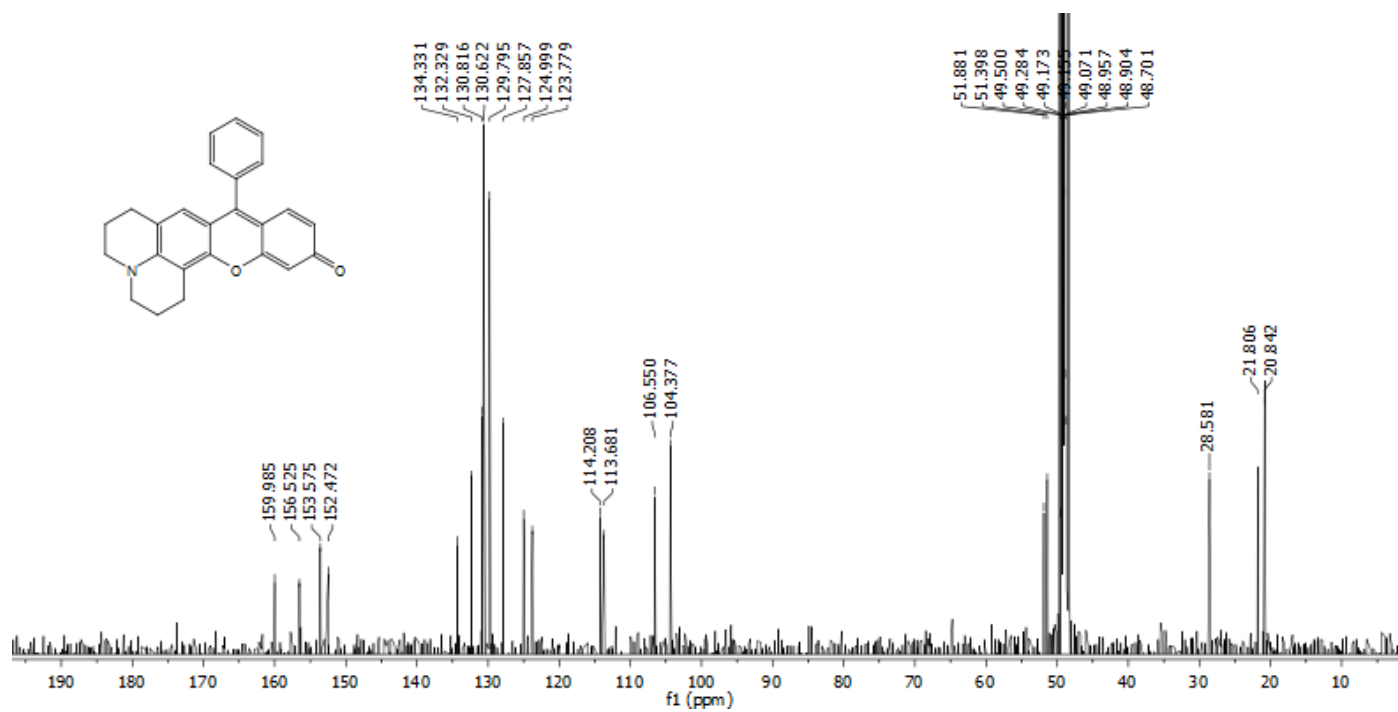



Compound 4 (acylated methoxy-intermediate)

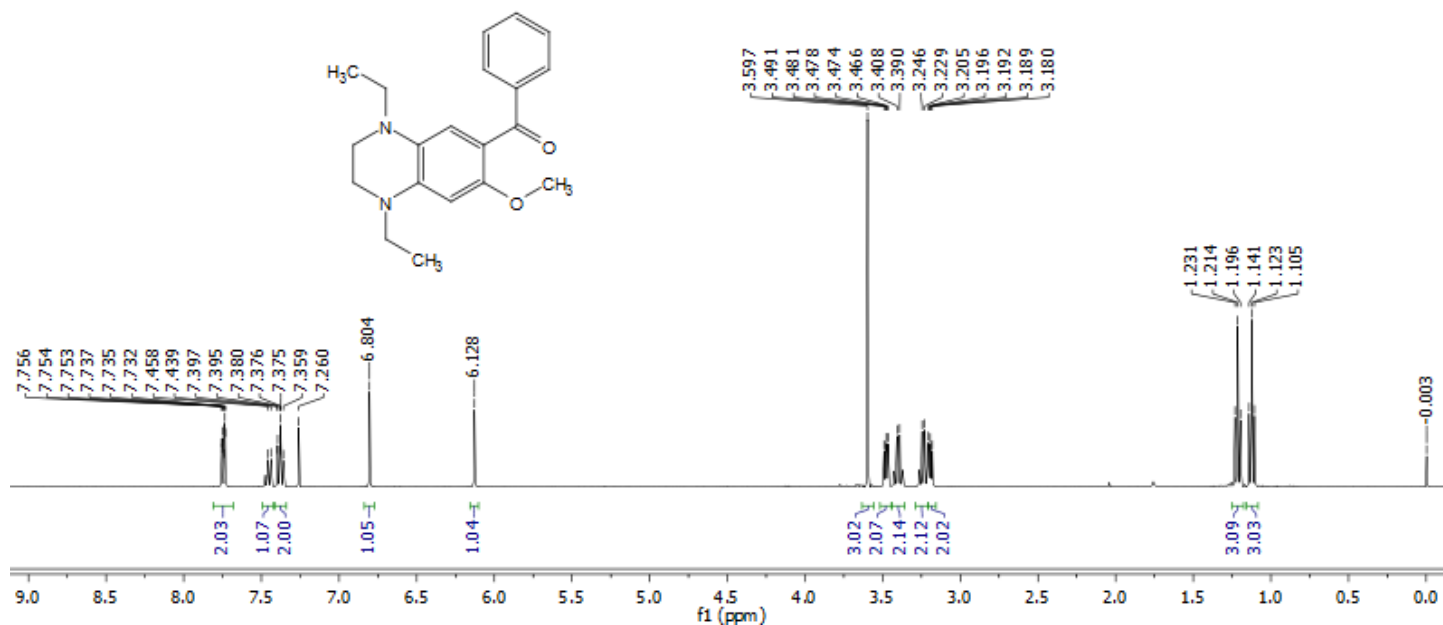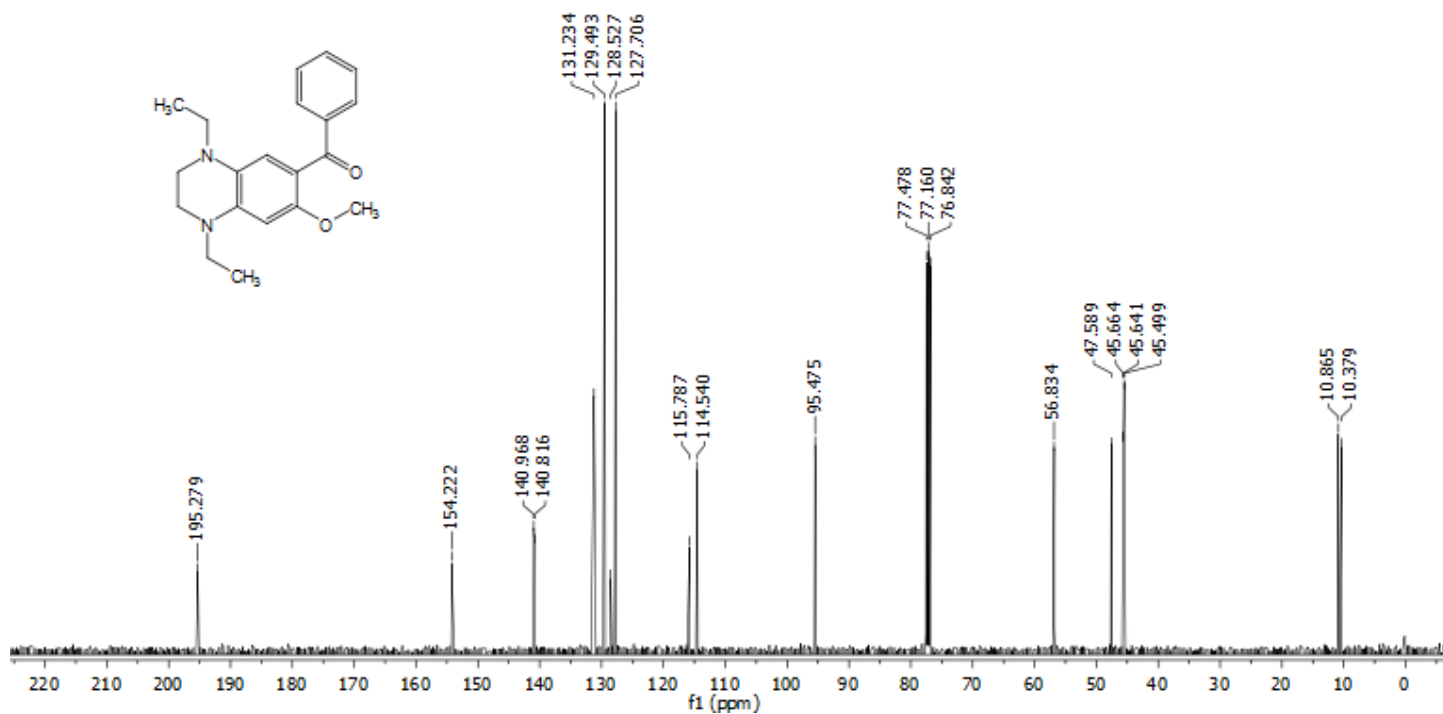

Compound 4

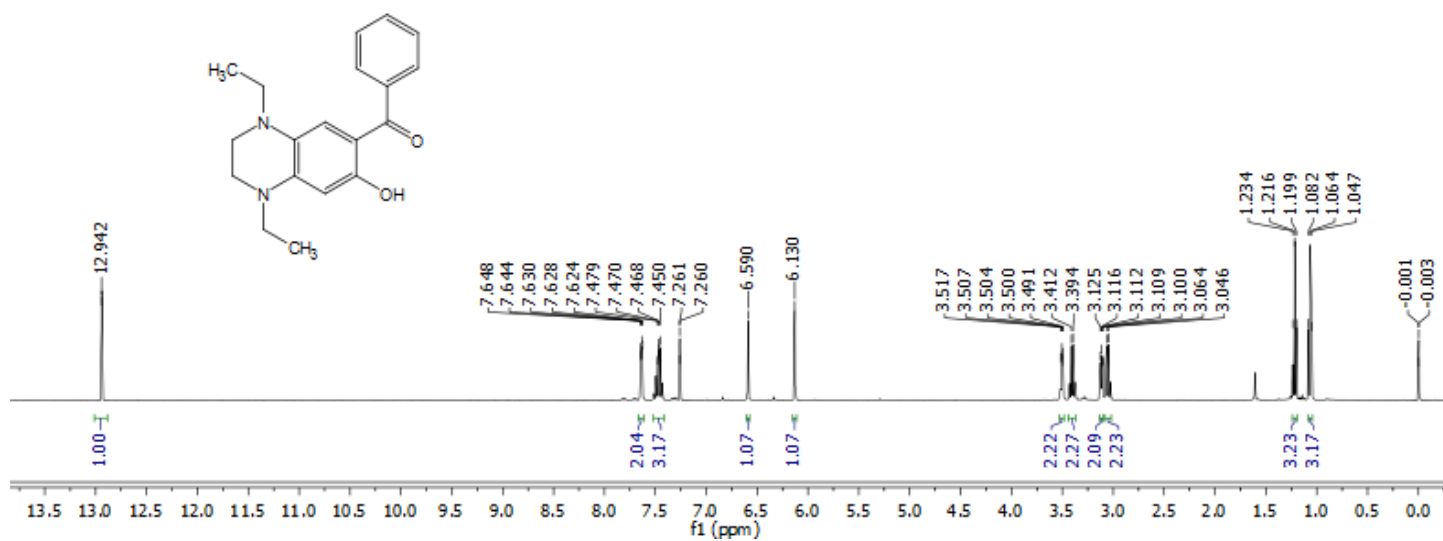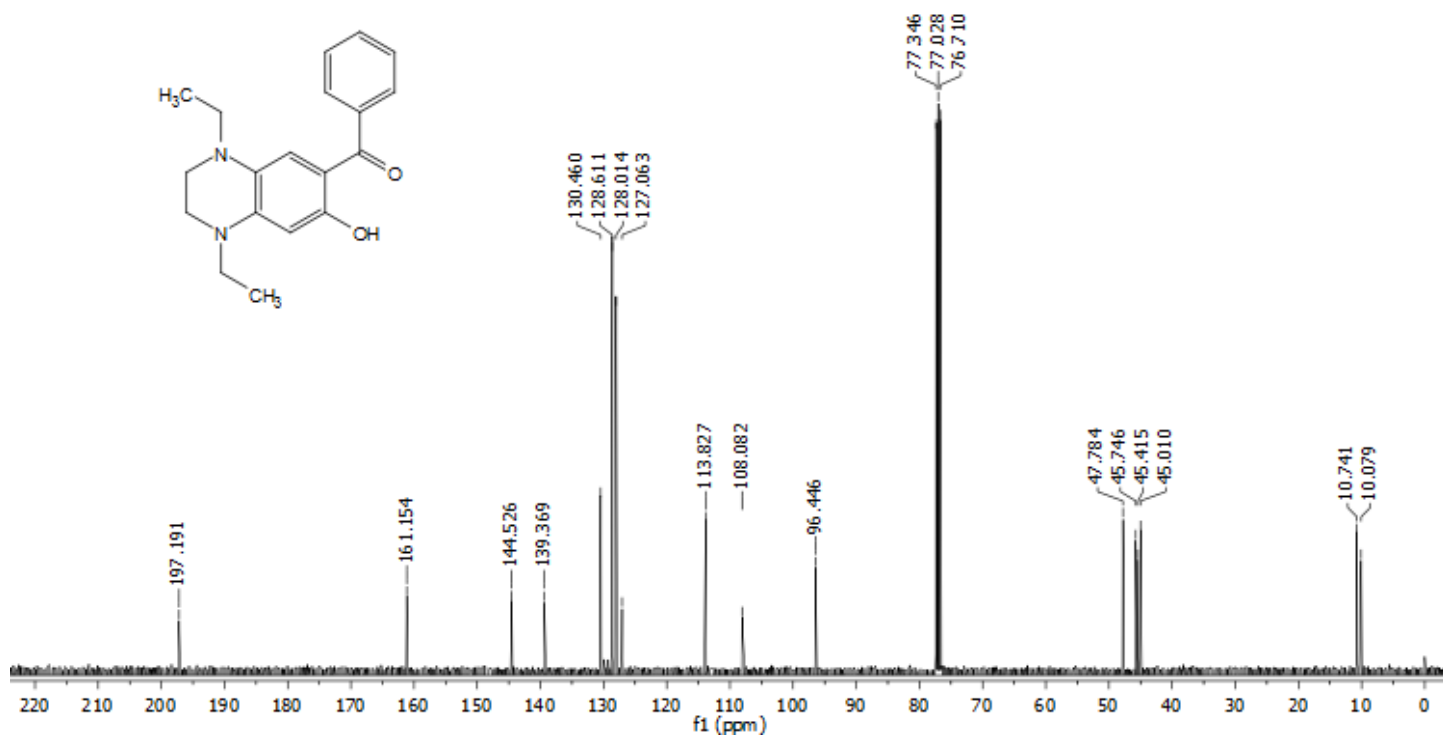

THQ-Rosol

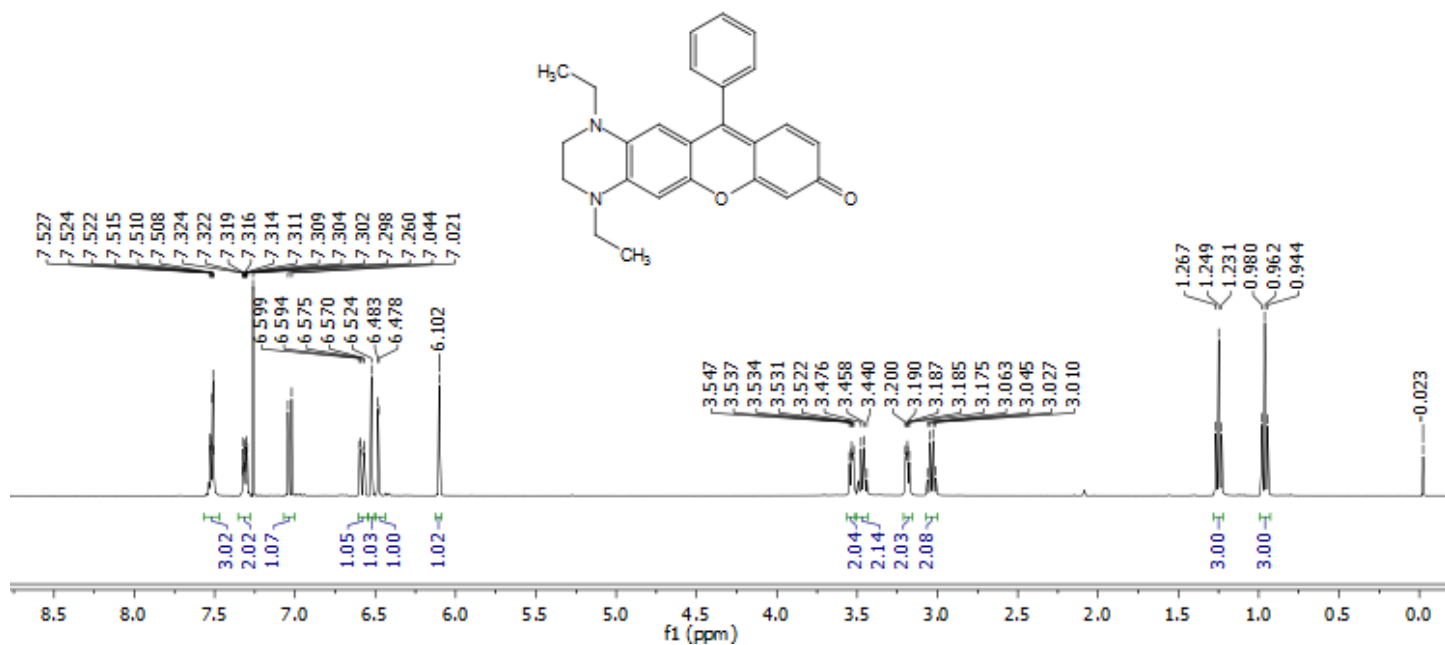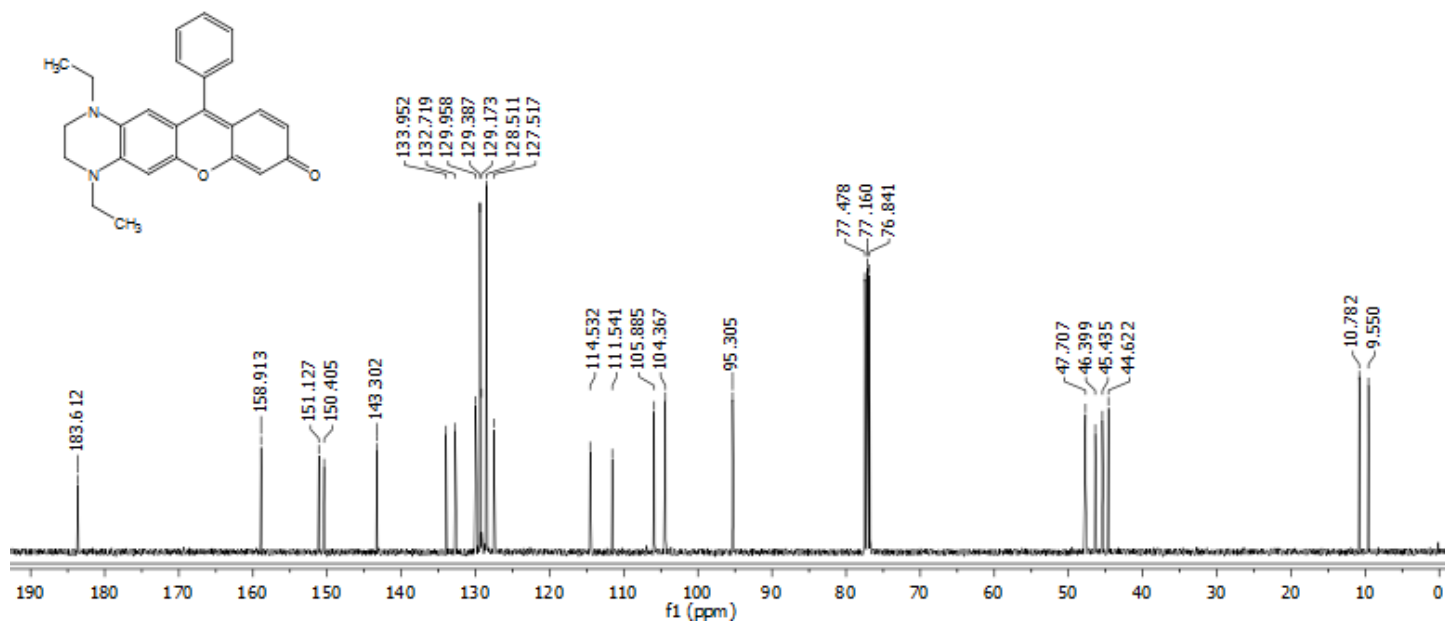

## **8. References**

1. Gaigalas, A. K. and Wang, L. Measurement of the Fluorescence Quantum Yield Using a Spectrometer with an Integrating Sphere Detector. *J. Res. Natl. Inst. Stand. Technol.* **2008**, 113, 17-28.
2. Lakowicz, J. R. *Principles of Fluorescence Spectroscopy*, 3<sup>rd</sup> ed.; Springer: New York, 2006.
3. Vazquez, M. E.; Blanco, J. B.; Imperiali, B. Photophysics and Biological Applications of the Environment-Sensitive Fluorophore 6-*N,N*-Dimethylamino-2,3-naphthalimide. *J. Am. Chem. Soc.* **2005**, 127, 1300-1306.
4. Gao, S.; Hao, L.; Li, J.; Lin, P.; Li, D.; Shuang, S.; Dong, C. Photophysical processes of an intramolecular charge transfer fluorescent dye with carbazole units. *Luminescence* **2013**, 28, 412-418.
5. Loukova, G. V.; Vasiliev, V. P.; Milov, A. A.; Smirnov, V. A.; Minkin, V. I. Unraveling electronic properties of an organometallic solute: Lippert-Mataga and quantum-chemical extensive study. *J. Photochem. Photobiol. A* **2016**, 327, 6-14.
6. Mishra, A.; Sahu, S.; Tripathi, S.; Krishnamoorthy, G. Photoinduced intramolecular charge transfer in *trans*-2-[4'-(*N,N*-dimethylamino)styryl]imidazo-[4,5-*b*]pyridine: effect of introducing a C=C double bond. *Photochem. Photobiol. Sci.* **2014**, 13, 1476-1486.
